## Does physical activity in childhood or adolescence predict future anxiety, depression, or wellbeing? A systematic review of 98 prospective cohort studies.

Christopher Knowles<sup>1\*</sup>, Kyle F. Paradis<sup>1</sup>, Stephen Shannon<sup>1</sup>, Gavin Breslin<sup>2</sup>, Angela Carlin<sup>1</sup>

<sup>1</sup>Sport and Exercise Sciences Research Institute, School of Sport, Ulster University, Belfast, United Kingdom

<sup>2</sup>Bamford Centre for Mental Health and Well-being, School of Psychology, Ulster University, Coleraine, United Kingdom

\*Corresponding author

Email: [knowles-c2@ulster.ac.uk](mailto:knowles-c2@ulster.ac.uk)

## Abstract

Physical activity (PA) is a modifiable health behaviour that can support and improve mental health. The tendency for activity levels to track over time suggests that through continued participation, those most active in youth may experience better long-term mental health than less active peers. Exploring the extent to which mental health benefits of child/adolescent PA persevere over time helps advocates and policy-makers determine whether PA promotion in youth constitutes effective allocation of public health resources and a viable means of reducing the global burden of common mental disorders and suboptimal wellbeing across the lifespan. This systematic review synthesised evidence for childhood/adolescent PA as a predictor of future anxiety, depression and wellbeing indicators (PROSPERO: CRD42021242555). Systematic searches of CINAHL, Medline, PsycInfo, and Scopus (conducted 27<sup>th</sup> October 2022) returned 12,703 articles with 98 retained. Included: prospective, quantitative, longitudinal designs; PA measured ages 5-17 years; anxiety, depression, and/or wellbeing indicators measured at least 12 months later; generally healthy populations. Excluded: severe mental illnesses. Risk of bias and quality of evidence were assessed following the GRADE framework. Effect sizes from moderate- and high-quality studies are discussed narratively. Studies are grouped by mental health outcome, PA type, domain, and whether participants adhered to current World Health Organisation PA guidelines. PA was negatively associated with depression in 41/67 studies (61.2%); anxiety in 20/35 studies (57.1%); and positively associated with wellbeing in 25/39 studies (64.1%). Effect sizes for all outcomes were small and evidence quality low across all timeframes. Team sports were the most consistently predictive type of PA. Whether domain-specific activities or guideline (non)adherence have differential effects remains unclear. Heterogeneity was attributed to the vastness of associations tested and psychometric measures used. Current literature offers low-quality partial evidence that childhood/adolescent PA has small beneficial effects for prospective anxiety, depression and wellbeing at least 12 months later.

*Keywords:* Adolescents, Anxiety, Children, Depression, Physical Activity, Wellbeing

1 Does physical activity in childhood or adolescence predict future  
2 anxiety, depression or wellbeing? A systematic review of  
3 98 prospective cohort studies

4 **Introduction**

5 **Physical activity & mental health**

6 There is global consensus that Physical Activity (PA) can be a viable low-risk, low-cost  
7 mental health intervention throughout the lifespan and across the world. Researchers and leading  
8 public health authorities are agreed that PA can be effective at managing depression [1], anxiety  
9 [2] and wellbeing [3]. The European Psychiatric Committee declared that PA can be at least as  
10 effective as antidepressant drugs in reducing depressive symptoms [4]. A scientific report  
11 submitted to the US Secretary of Health and Human Services found strong evidence that moderate-  
12 to-vigorous PA (MVPA) can reduce state and trait anxiety in multiple age groups [5]. The  
13 Australian Department of Health and Aged Care recommends that following their 24-hour  
14 movement guidelines, should result in better wellbeing for all age groups, with low risk of serious  
15 injury [6],[7].

16 **A two-continua approach to mental health**

17 Keyes' two-continua model recognises mental illness and wellbeing as two independent,  
18 albeit co-related, concepts existing within overall mental health [8]. Keyes' model suggests that  
19 wellbeing is not synonymous to the absence of mental illness. Rather, individuals can and should  
20 actively pursue social, emotional, and psychological wellbeing outcomes alongside any steps taken  
21 to reduce their risk of illness [9]. An individual with high levels of wellbeing and low levels of  
22 mental illness may be described as flourishing [10],[11].

23 Flourishing is the epitome of mental health. A nationally representative study from the  
24 Netherlands reported that only 37% of the population were flourishing [12] inferring many people

25 are failing to reach their potential in areas such as psychosocial functioning, occupational  
26 productivity, and healthcare utilisation [9]. Whilst up-to-date research is required to substantiate  
27 these statistics in the present day, it remains likely that sub-optimal mental health is having a  
28 greater impact than is commonly understood. Health behaviours such as PA that have potential to  
29 increase the prevalence of flourishing through management of mental illness symptomology and  
30 wellbeing support may be best placed to help build a more prosperous and healthy society.

### 31 **Anxiety & depression**

32 The most Common Mental Disorders (CMDs) – Anxiety and Depression – are leading  
33 contributors to the global burden of disease and are becoming increasingly prevalent over time  
34 [13]. Depression and anxiety affect 280 million (23 million children/adolescents) and 301 million  
35 (58 million children/adolescents) globally [13] with one in three individuals likely to experience a  
36 CMD at some point in their lives [14]. From an economic-productivity perspective, scaling up  
37 treatments for CMDs is projected to have a combined benefit of \$310 billion globally by 2030  
38 [15]. From a health perspective, this equates to 43 million extra healthy life years [15],[16]. The  
39 investment needed to sufficiently scale-up treatments is considerable, making low-cost methods  
40 of managing CMDs including through effective PA promotion, highly desirable.

### 41 **Wellbeing**

42 Although an historically elusive construct to define, wellbeing can be considered a state of  
43 positive feeling and meeting one's full potential in the world [17]. Whilst CMDs consist of  
44 symptoms of mal- or sub-optimal-functioning, wellbeing consists of symptoms of positive  
45 functioning and/or positive characteristics [18]. Compared to CMDs, indicators of wellbeing have  
46 been less heavily researched thus, the economic impact of poor wellbeing is not widely known.  
47 That being said, elevated levels of wellbeing have been associated with greater productivity, more  
48 meaningful relationships and pro-social behaviour [18],[19] all of which have economic and  
49 societal implications.

## 50 **Children & adolescents**

51 Despite evidence for the benefits of PA, global rates of inactivity remain high. In 2019, the  
52 WHO updated their Global Action Plan for PA in which they set out to achieve a 15% reduction  
53 in inactivity by 2030 [20]. On their current trajectory, it appears the WHO may fall short of that  
54 target [21],[22]. Given that resources dedicated to PA promotion on a national level are often  
55 limited, public health would benefit from a better understanding of where investment in PA  
56 promotion is likely to see the best return with regards to long-term mental health benefits. To this  
57 end, it is possible that children and adolescents are a key target population.

58 Whilst associations between PA and mental health in younger populations are less  
59 consistently observed than in adults, previous reviews have concluded there is partial evidence for  
60 a causal link between child/adolescent PA, lower levels of mental illness, and greater wellbeing  
61 [23]-[25]. One important causal pathway through which child/adolescent PA may support long-  
62 term mental health is in the tendency for PA levels to track across the lifespan [26],[27]. Whilst  
63 rates of activity generally decrease as we age, those most active early in life tend to remain the  
64 most active as adults [27]. This means interventions successful at upscaling PA in children and  
65 adolescents not only have potential to benefit young people in the short-term but may improve  
66 future rates of participation and subsequently, future mental health [28]. Such an outcome would  
67 constitute an effective use of public health resources, particularly for young people – a high risk  
68 group due to high rates of inactivity and the early age of onset of symptoms of mental illness [29]-  
69 [31].

70 A comprehensive systematic review of the literature investigating associations between  
71 child/adolescent PA and future mental health outcomes has not been conducted. To better  
72 understand these longitudinal associations, a review should consider relationships measured over  
73 lengthy timeframes with outcomes pertaining to both mental illness and wellbeing. A time interval  
74 of at least one year between first PA measurement and prospective mental health outcomes

75 represents a significant window in which to capture psychological developmental changes and  
76 would strengthen understanding of how long associations persist over time [32],[33].

## 77 **The current study**

78 The aim of the present systematic review was to synthesise evidence for a longitudinal  
79 relationship between PA participation in youth and prospective mental health outcomes measured  
80 at least one year later. To align with Keyes’ two-continua model, the review included measures of  
81 mental illness (i.e., anxiety, depression) and indicators of social, emotional and psychological  
82 wellbeing. The review has been reported in line with the recently updated Preferred Reporting  
83 Items for Systematic Reviews and Meta-Analyses (PRISMA) guidelines [34]. The following  
84 review questions were written *a priori*:

- 85 1. Can PA performed in youth reduce depressive disorders/symptoms at least 12 months later?
- 86 2. Can PA performed in youth reduce anxiety disorders/symptoms at least 12 months later?
- 87 3. Can PA performed in youth improve indicators of wellbeing at least 12 months later?

88 To offer the most holistic insight of associations observed to date we reviewed PA in its  
89 broadest sense, “any form of bodily movement performed by skeletal muscles that results in an  
90 increase in energy expenditure” [20],[35]. To make findings useful in a real-world context, we then  
91 sorted the PA performed into subgroups where possible. Public health messaging consistently  
92 emphasises the importance of children/adolescents achieving WHO guidelines of 60minutes  
93 MVPA per day. Additionally, effects are often dependent on the type of activity (i.e., individual or  
94 group-based) [36],[37] and the life domain it is performed in (i.e., leisure, occupational/school-  
95 based, transport-based, household) [38],[39]. Therefore, as secondary lines of enquiry, we also  
96 aimed to synthesise evidence for the effects of (non)adherence to current WHO MVPA guidelines,  
97 individual versus group-based activities, and PA in different life domains where possible.

## 98 **Materials & methods**

99           The review protocol was published on PROSPERO on 15<sup>th</sup> March 2021 prior to any formal  
100 database searches and can be accessed via the registration number: CRD42021242555.

### 101 **Eligibility criteria**

#### 102 **Participants**

103           Included studies were restricted to those published in English using generally healthy  
104 populations [38]. Studies were also restricted to those that collected PA data from school-aged  
105 children/adolescents between the ages of 5 and 17 years. Many PA interventions in youths are  
106 carried out in-school so using the school years as our upper and lower age thresholds seemed a  
107 sensible way to define the target population. Further, the WHO propose PA guidelines for those  
108 aged 5 to 17 years old so using these age thresholds best facilitated a review of the effects of  
109 adherence to the current youth guidelines. If studies included samples where some participants  
110 were within this range and some not (e.g., 15 to 20 years old), they were included if the mean age  
111 of the sample fell within the target range. At no point did review authors have access to information  
112 that could be used to personally identify participants.

#### 113 **Study length**

114           When first conceptualising the review, the original aim was to capture studies that followed  
115 participants as they moved from one key life stage to another. In principle, this was to help answer  
116 whether more active young people make more mentally healthy adults. Operationally, this proved  
117 difficult and came with the risk that a three-year-long study may be excluded if it were performed  
118 between the ages of 6 and 9 (i.e., all within childhood) yet a one-year-long study would be included  
119 if it followed participants from age 17 to 18 thus covering what arguably denotes a transition from  
120 adolescence into adulthood. Ongoing debate regarding the age at which one life stage ends and  
121 another begins added a further layer of complexity to achieving this research aim and made robust

122 methodology elusive [40]. The most inclusive and methodologically coherent approach to achieve  
123 our research aim was to target studies that analysed mental health data collected at least 12 months  
124 after initial PA measurement. Whilst this meant that there would be studies included that did not  
125 follow participants as they moved through different life stages, it would offer a more complete  
126 insight into the perseverance of PA-related mental health benefits over time and limit the chance  
127 that important studies were overlooked.

## 128 **Measures**

129 Short-term recall questionnaires typically gather information pertaining to the past few  
130 weeks or months whilst quantitative history questionnaires probe memories from several years ago  
131 or across an entire lifespan [41]. To minimise the risk of recall bias, measures of PA had to  
132 constitute short-term recall (i.e., PA within the last year) or be collected by wearable devices.

133 Included studies investigated anxiety, depression, and/or indicators of wellbeing. As the  
134 two-continua model views mental illness and wellbeing as independent concepts, measures were  
135 excluded if they combined items targeting depression/anxiety and wellbeing into one overall  
136 mental health score. The focus was on CMDs rather than severe mental illnesses (e.g., suicidal  
137 ideation, psychosis) due to their comparatively greater contribution to the overall global burden of  
138 disease [13].

139 An operational definition of flourishing identifies 10 symptoms said to represent the mirror  
140 opposite of CMDs [18]. Competence, engagement, meaning, and positive relationships represent  
141 elements of positive functioning whilst emotional stability, optimism, positive emotions,  
142 resilience, self-esteem, and vitality represent positive characteristics. Including all 10 factors in a  
143 single review would be unwieldy. Instead, three items were identified through group discussion  
144 that either represent or heavily contribute to social, emotional, and psychological wellbeing as per  
145 the two-continua model and the definition of flourishing discussed. Positive emotions (e.g.,  
146 happiness, life satisfaction) are essential criteria for flourishing hence, these measures qualified as



147 indicators of emotional wellbeing [18]. Positive relationships (e.g., social competence, peer-  
148 relations) and self-esteem represented indicators of (1) positive functioning/social wellbeing, and  
149 (2) positive characteristics/psychological wellbeing, respectively. Self-esteem was selected as a  
150 requisite for flourishing over other positive characteristics given its importance to schools and  
151 other key stakeholders.

## 152 **Search strategy, study selection and data collection**

153 Systematic searches of CINAHL Complete, Medline, PsycInfo, and Scopus were  
154 conducted from inception to 27<sup>th</sup> October 2022. Key words used to capture studies of CMDs were  
155 derived from DSM-5 definitions of anxiety/depressive disorders. Huppert and So's operational  
156 definition of flourishing [18] and Keyes' two-continua model [8] were used to identify key words  
157 relating to positive emotions (emotional wellbeing), positive relationships (social wellbeing) and  
158 self-esteem (psychological wellbeing). Reference lists of similar existing reviews were manually  
159 searched as were authors own libraries. Search results were uploaded to online systematic review  
160 software Covidence where eligibility criteria were visibly displayed above each article. Authors  
161 confirmed each point sequentially to determine eligibility. Full search strategies for all databases  
162 and a succinct version of the eligibility criteria can be found in the published review protocol.

163 Articles first underwent title and abstract screening by a single reviewer removing those  
164 that were clearly irrelevant to the focus of the review. It is not essential that this stage be carried  
165 out by two reviewers [42] nevertheless, 1270 excluded studies (10%) were screened again by a  
166 second reviewer. Dual screening a random subset of excluded studies allowed reviewers to  
167 estimate the number of studies mistakenly omitted and assess inter-rater reliability. Next, two  
168 authors independently reviewed the full texts of remaining articles to determine which should be  
169 included in final analysis. Disputes were resolved through discussion with a third and/or fourth  
170 reviewer. Data extraction was conducted by one reviewer using a bespoke data extraction template.

## 171 **Data items**

172 Data were extracted on study characteristics including authors, location, study design, the  
173 name of the dataset used (if applicable), and the data collection schedule, as well as the age,  
174 number, and sex/gender split of participants. Further information included: the source of PA and  
175 mental health data (e.g., self-report, accelerometers); measures used; association(s) tested;  
176 confounding variables; analysis performed; and results. Information provided by study authors  
177 and/or the wording of specific items were used to categorise the type and domain of PA, and  
178 whether participants adhered to PA guidelines. Further information was extracted to aid quality of  
179 evidence and risk of bias assessment, explained in detail below.

## 180 **Evidence quality & risk of bias**

181 A quality of evidence and risk of bias assessment was made for each study by two  
182 independent reviewers using the framework proposed by the GRADE Working Group [43].  
183 Evidence was graded as high, moderate, low, or very low. The items used to investigate certainty  
184 of evidence, sources of heterogeneity, and risk of bias have been published elsewhere [43].

## 185 **Synthesis methods**

186 Included studies were heterogeneous with regards to the timespans covered and  
187 associations tested. After discussion, authors agreed the review was best suited to an exploratory  
188 analysis of potential sources of heterogeneity through narrative synthesis to offer more nuanced  
189 conclusions. Results were therefore synthesized according to the Synthesis Without Meta-Analysis  
190 (SWiM) reporting guidelines [44].

191 Studies reporting statistically significant associations at the 0.05 level were considered as  
192 providing evidence of the direction of an effect. The total number of studies reporting evidence  
193 (or lack thereof) an effect were summed and grouped by mental health outcome and length of  
194 follow-up in years to provide an overview of the literature as a whole and the timescales across

195 which childhood/adolescent PA was statistically significantly predictive of future mental health.  
196 This approach has been taken in existing reviews in other areas of public health[45]. However, the  
197 large sample sizes often used meant it was not surprising to find a considerable number of  
198 statistically significant associations. To avoid over-reliance on statistical significance as evidence  
199 of an effect and the risk that inappropriate conclusions would be drawn from low quality evidence;  
200 effect sizes reported in moderate- and high-quality studies were interpreted and discussed using  
201 thresholds proposed in existing research [46],[47].

202 Finally, the main analysis was supplemented with important contextual information on  
203 studies investigating type/domain of activity and guideline adherence to strengthen depth of  
204 understanding. Summary of Findings (SoF) tables for each secondary review question include a  
205 brief explanation of the associations tested and effect sizes reported in each study (see supporting  
206 information). Again, this approach has been used in existing reviews [48].

207 All studies were eligible for data synthesis provided they did not replicate research from  
208 other studies using the same dataset. This was to limit the risk that data from a single source skewed  
209 conclusions drawn [49]. Supporting information (File S2) has been provided on the study  
210 modifiers used to differentiate between studies using the same datasets to ensure each made a  
211 unique contribution to knowledge. Modifiers related to Participants, Exposure, Outcomes and  
212 Study Design.

## 213 **Results**

### 214 **Study selection**

215 After removal of duplicates, systematic searches returned 12,703 articles to be screened by  
216 title and abstract. A total of 496 articles underwent full text review. Conflicts were resolved and  
217 data was extracted from 100 studies. A further two studies were removed<sup>(74, 86)</sup> post-extraction as  
218 they replicated research conducted by other included studies using the same data-source.

219 Supporting information has been provided detailing the decision-making process that led to the  
220 exclusion of these studies (Supporting Table S1). This left 98 studies eligible for synthesis.

221 Of the 1270 excluded studies reviewed by a second reviewer, 25 (2.3%) were retained for  
222 full text review of which only 1 (0.1%) was included in final analysis. This speaks to the rigor with  
223 which title and abstract screening was carried out indicating the use of a single reviewer at this  
224 stage did not meaningfully detract from review reliability. A detailed report of the number of  
225 articles returned per database and the reasons for exclusion are presented in the PRISMA flowchart  
226 (Fig 1).

227 \*\*\* **Figure 1: PRISMA flowchart** \*\*\*

## 228 **Study characteristics**

229 *Table 1* provides an index of all original 100 articles. Of the 98 articles included in the  
230 synthesis, there were 94 observational cohort studies (95.9%) and four randomized trials<sup>(8, 49, 53,</sup>  
231 <sup>54)</sup>. Studies were conducted throughout North America ( $n = 48$ ), Europe ( $n = 37$ ), Australia ( $n =$   
232  $11$ ) and Asia ( $n = 2$ ). Secondary analysis was conducted by 81 studies using data from 53 different  
233 longitudinal cohort study projects. The most heavily used data source was the National  
234 Longitudinal Study of Adolescent to Adult Health (Add Health) used in 10 separate studies<sup>(10, 15,</sup>  
235 <sup>19, 21, 25, 44, 48, 61, 96, 98)</sup> followed by the Nicotine Dependence in Teens Study (NDIT)<sup>(5, 14, 39, 50, 63)</sup>.  
236 The remaining 17 studies appeared to use primary data collected by the lead author or their  
237 research partners<sup>(16, 20, 27, 28, 38, 59, 60, 62, 65, 66, 67, 68, 82, 83, 92, 94, 100)</sup>. The most heavily researched mental  
238 health outcome was depression, investigated in 67/98 studies (68.4%) compared to 35/98 (35.7%)  
239 investigating anxiety and 39/98 (39.8%) investigating wellbeing. A quality of evidence assessment  
240 was conducted for each study: High ( $n = 4$ ), Moderate ( $n = 10$ ), Low ( $n = 59$ ), or Very Low ( $n =$   
241  $25$ ). Overall, the quality of evidence investigating the association between childhood/adolescent  
242 PA and mental health outcomes at least 12 months later was low for anxiety, low for depression,  
243 and low for indicators of wellbeing.

244 **Table 1**245 *Index of all included studies and the mental health outcomes they investigated*

| ID | Authors (Date of Publication) | Mental Illness |      |        | Wellbeing |      |      | ID                           | Authors (Date of Publication) | Mental Illness |        |      | Wellbeing |   |  |
|----|-------------------------------|----------------|------|--------|-----------|------|------|------------------------------|-------------------------------|----------------|--------|------|-----------|---|--|
|    |                               | Dep.           | Anx. | Psych. | Soc.      | Emo. | Dep. |                              |                               | Anx.           | Psych. | Soc. | Emo.      |   |  |
| 1  | Adachi & Willoughby (2014)    |                |      | ✓      |           |      | 30   | Gunnell et al. (2016a)       | ✓                             | ✓              |        |      | ✓         |   |  |
| 2  | Agans et al. (2017)           | ✓              |      |        |           |      | 31   | Gunnell et al. (2016b)       | ✓                             | ✓              |        |      |           |   |  |
| 3  | Ahn et al. (2018)             |                | ✓    |        |           |      | 32   | Hamer et al. (2020)          | ✓                             |                |        |      |           |   |  |
| 4  | Ames & Leadbeater (2018)      | ✓              |      |        |           | ✓    | 33   | Herman et al. (2010)         |                               |                |        |      | ✓         |   |  |
| 5  | Ashdown-Franks et al. (2017)  |                | ✓    |        |           |      | 34   | Hoegh-Poulsen et al. (2016)  | ✓                             |                |        |      |           |   |  |
| 6  | Barber et al. (2001)          | ✓              | ✓    | ✓      |           |      | 35   | Howie et al. (2016)          | ✓                             | ✓              |        |      |           |   |  |
| 7  | Bedard et al. (2020)          |                |      |        |           | ✓    | 36   | Howie et al. (2020)          | ✓                             | ✓              |        |      |           |   |  |
| 8  | Bell et al. (2019)            |                | ✓    | ✓      | ✓         | ✓    | 37   | Isaksson et al. (2020)       | ✓                             | ✓              |        |      |           |   |  |
| 9  | Birkeland et al. (2009)       | ✓              |      |        |           |      | 38   | Jerstad et al. (2010)        | ✓                             |                |        |      |           |   |  |
| 10 | Bohr et al. (2019)            | ✓              |      |        |           |      | 39   | Jewett et al. (2014)         | ✓                             |                |        |      |           |   |  |
| 11 | Brière et al. (2020)          | ✓              | ✓    |        |           |      | 40   | Kalimo & Vuori (1990)        |                               |                |        |      |           | ✓ |  |
| 12 | Brière et al. (2018)          | ✓              | ✓    |        |           |      | 41   | Kandola et al. (2020a)       | ✓                             |                |        |      |           |   |  |
| 13 | Brunes et al. (2015)          | ✓              | ✓    |        |           | ✓    | 42   | Kandola et al. (2020b)       |                               | ✓              |        |      |           |   |  |
| 14 | Brunet et al. (2013)          | ✓              |      |        |           |      | 43   | Kaseva et al. (2016)         | ✓                             |                |        |      |           |   |  |
| 15 | Carter et al. (2015)          | ✓              |      |        |           |      | 44   | Kort-Butler & Hageven (2011) |                               |                |        | ✓    |           |   |  |
| 16 | Carvajal (2012)               | ✓              |      |        |           |      | 45   | Mahoney & Vest (2012)        | ✓                             | ✓              |        | ✓    | ✓         | ✓ |  |
| 17 | Clark et al. (2007)           | ✓              |      |        |           |      | 46   | Marsh & Kleitman (2003)      |                               |                |        | ✓    |           |   |  |
| 18 | Colman et al. (2014)          | ✓              |      |        |           |      | 47   | McKercher et al. (2014)      | ✓                             |                |        |      |           |   |  |
| 19 | Daniels & Leaper (2006)       |                |      | ✓      |           |      | 48   | McPhie & Rawana (2015)       | ✓                             |                |        |      |           |   |  |
| 20 | Denalt et al. (2009)          | ✓              |      |        |           |      | 49   | Motl (2004)                  | ✓                             |                |        |      |           |   |  |
| 21 | Deshpande et al. (2020)       | ✓              | ✓    |        |           |      | 50   | Murray et al. (2021)         | ✓                             | ✓              |        |      |           |   |  |
| 22 | Doré et al. (2020)            |                |      | ✓      | ✓         | ✓    | 51   | Nigg et al. (2021)           |                               | ✓              |        |      | ✓         |   |  |
| 23 | Doré et al. (2019)            |                |      | ✓      | ✓         | ✓    | 52   | Noordstar et al. (2016)      |                               |                |        | ✓    |           |   |  |
| 24 | Duncan et al. (2021)          | ✓              | ✓    | ✓      | ✓         | ✓    | 53   | Olive et al. (2019)          | ✓                             |                |        |      |           |   |  |
| 25 | Easterlin et al. (2019)       | ✓              | ✓    |        |           |      | 54   | Omorou et al. (2016)         |                               |                |        |      | ✓         |   |  |
| 26 | Fløtnes et al. (2011)         | ✓              | ✓    |        |           |      | 55   | Patte et al. (2020)          | ✓                             |                |        |      |           |   |  |
| 27 | Gómez-Baya et al. (2018)      |                |      |        |           | ✓    | 56   | Perron et al. (2012)         | ✓                             |                |        |      |           |   |  |
| 28 | Gómez-Baya et al. (2020)      | ✓              |      |        |           |      | 57   | Piché et al. (2019)          | ✓                             |                |        |      |           |   |  |
| 29 | Graupensperger et al. (2021)  | ✓              | ✓    |        |           | ✓    | 58   | Rangul et al. (2012)         | ✓                             |                |        |      |           | ✓ |  |

| ID | Authors (Date of Publication)     | Mental Illness |      |        |      |      | Wellbeing |                               |      |      |        |      |      |
|----|-----------------------------------|----------------|------|--------|------|------|-----------|-------------------------------|------|------|--------|------|------|
|    |                                   | Dep.           | Anx. | Psych. | Soc. | Emo. | ID        | Authors (Date of Publication) | Dep. | Anx. | Psych. | Soc. | Emo. |
| 59 | Raudsepp & Neissaar (2012)        | ✓              |      |        |      |      | 80        | Toseeb et al. (2014)          | ✓    |      |        |      |      |
| 60 | Raudsepp & Vink (2019)            | ✓              |      |        |      |      | 81        | Van Dijk et al. (2016)        | ✓    |      | ✓      |      |      |
| 61 | Rees & Sabia (2010)               | ✓              |      | ✓      |      |      | 82        | Visser et al. (2020)          |      |      | ✓      | ✓    |      |
| 62 | Rongen et al. (2020)              |                |      |        | ✓    |      | 83        | Wagnsson et al. (2014)        |      |      | ✓      |      |      |
| 63 | Sabiston et al. (2016)            | ✓              |      |        |      |      | 84        | Wang et al. (2017)            | ✓    |      |        |      |      |
| 64 | Sagatun et al. (2007)             |                | ✓    |        | ✓    |      | 85        | Wiles et al. (2008)           |      | ✓    |        |      |      |
| 65 | Sánchez-Oliva et al. (2020)       | ✓              |      |        |      | ✓    | 86        | Wu et al. (2017)              | ✓    | ✓    |        |      |      |
| 66 | Schmalz et al. (2007)             |                |      | ✓      |      |      | 87        | Wu et al. (2018)              | ✓    |      |        |      |      |
| 67 | Schumacher-Dimech & Seiler (2011) |                | ✓    |        |      |      | 88        | You et al. (2021)             | ✓    |      |        |      | ✓    |
| 68 | Seeley et al. (2009)              | ✓              |      |        |      |      | 89        | Wilson et al., (2022)         |      |      |        |      | ✓    |
| 69 | Shin & You (2013)                 |                |      |        |      | ✓    | 90        | Redig et al., (2022)          | ✓    |      |        |      |      |
| 70 | Slutzky & Simpkins (2009)         |                |      | ✓      |      |      | 91        | Kandola et al., (2022)        |      | ✓    |        |      |      |
| 71 | Slykerman et al. (2020)           | ✓              |      |        |      |      | 92        | Barth Vedøy et al., (2021)    |      |      | ✓      | ✓    | ✓    |
| 72 | Spreitzer (1994)                  |                |      | ✓      |      |      | 93        | O'Flaherty et al., (2022)     | ✓    | ✓    |        | ✓    |      |
| 73 | Stavrakakis et al. (2012)         | ✓              |      |        |      |      | 94        | Jetten et al., (2022)         | ✓    | ✓    |        |      |      |
| 74 | Stavrakakis et al. (2013a)        | ✓              |      |        |      |      | 95        | Harbec et al., (2022)         | ✓    | ✓    |        |      |      |
| 75 | Stavrakakis et al. (2013b)        | ✓              |      |        |      |      | 96        | García-Hermoso et al., (2022) | ✓    |      |        |      |      |
| 76 | Stein et al. (2007)               |                |      | ✓      | ✓    |      | 97        | Buchan et al., (2021)         | ✓    | ✓    |        |      |      |
| 77 | Ströhle et al. (2007)             | ✓              | ✓    |        |      |      | 98        | Iverson et al., (2021)        | ✓    |      |        |      |      |
| 78 | Suetani et al. (2017)             | ✓              | ✓    |        |      |      | 99        | White-Gosselin et al, (2022)  | ✓    | ✓    |        |      |      |
| 79 | Sund et al. (2011)                | ✓              |      |        |      |      | 100       | Latina et al., (2022)         | ✓    |      | ✓      |      |      |

247 Studies were published from 1990–2022. There were noticeable upticks in publications in  
248 2007, 2016, and 2020 signalling a gradual but consistent increase in research output in the area  
249 (Fig 2). A total of 75/98 (76.5%) articles were published from 2012-2022 and around half (48/98,  
250 49.0%) were from 2017 onward meaning most of the research reviewed was recently published  
251 and up to date at the time of writing. Evidence spanned 65 years with studies availing of PA and  
252 mental health data collected from 1955<sup>(40)</sup> to 2020<sup>(90)</sup>. Moderating effects of time are discussed  
253 herein. All studies used data collected before the outbreak of the Covid-19 pandemic. It remains  
254 to be seen whether young people engaging in PA before Covid-19 experienced mental health  
255 benefits upon emergence from the pandemic compared to their previously less active peers.

256 \*\*\* **Figure 2: Year of publication** \*\*\*

257 Self-report measures of PA were used in 88 studies, 11 used mechanical device-measured  
258 data<sup>(3, 8, 32, 41, 42, 65, 71, 80, 81, 82, 92)</sup>. One study used details of a football academy’s weekly training  
259 schedule as its PA data source<sup>(62)</sup> and one study used trained observers reports of children in a PE  
260 class<sup>(53)</sup>. All mental health outcomes were self-reported other than in one study using national  
261 medical databases to determine rates of clinical diagnoses of internalizing disorders<sup>(87)</sup>. A key for  
262 all acronyms used for mental health measures can be found at the bottom of Tables 2, 3, and 4,  
263 and in the supporting information. Studies used 23 different validated measures of depression of  
264 which the CES-D [50] was the most popular with 20/67 depression studies (30.0%) using a version  
265 of the scale<sup>(2, 10, 12, 15, 16, 21, 24, 25, 34, 48, 49, 55, 59, 60, 61, 71, 81, 96, 97, 100)</sup>. There were also 19 validated  
266 measures of anxiety and 15 validated scales measuring indicators of wellbeing. The most common  
267 measure of anxiety symptoms was the SDQ Emotional Symptoms subscale [51] used in 6/35  
268 (17.1%) of anxiety studies<sup>(3, 8, 51, 64, 85, 91)</sup>.

269 **Table 2**  
 270 *Studies investigating associations between physical activity and depression*

| ID | Dataset    | Participants<br>(n) | Age<br>(Baseline) | Age<br>(Follow-Up) | Study Length<br>(Years) | Measure (Subscale)    | Evidence of<br>Association | Quality of<br>Evidence |
|----|------------|---------------------|-------------------|--------------------|-------------------------|-----------------------|----------------------------|------------------------|
| 90 | NCDS       | 18,555              | 7                 | 62                 | 55                      | *Malaise (depression) | Y                          | High                   |
| 87 | CLASS      | 4861                | 10                | 18                 | 8                       | MSID; CIHIDAD         | Y                          | High                   |
| 61 | Add Health | 13,426              | 12-17             | 13-18              | 1                       | *CES-D                | Y                          | Moderate               |
| 96 | Add Health | 7069                | 12-17             | 33-39              | 21                      | *CES-D; Diagnosis     | Y                          | Moderate               |
| 41 | ALSPAC     | 4257                | 12                | 18                 | 6                       | *CIS                  | Y                          | Moderate               |
| 63 | NDIT       | 860                 | 12                | 20                 | 8                       | *MDI                  | Y                          | Moderate               |
| 39 | NDIT       | 853                 | 12                | 20                 | 8                       | *MDI                  | Y                          | Moderate               |
| 53 | LOOK       | 821                 | 8                 | 12                 | 4                       | *CDI                  | N                          | Moderate               |
| 99 | FLUPPY     | 785                 | 6                 | 10                 | 4                       | *PBQ; *CBC            | Y                          | Moderate               |
| 50 | NDIT       | 733                 | 12                | 20                 | 8                       | *MDI                  | N                          | Moderate               |
| 97 | COMPASS    | 23,395              | 14-18             | 15-19              | 1                       | *CES-D                | Y                          | Low                    |
| 10 | Add Health | 10951               | 12-17             | 29                 | 13                      | *CES-D                | Y                          | Low                    |
| 25 | Add Health | 4888                | 12-17             | 24-32              | 13                      | Diagnosis; *CES-D     | Y                          | Low                    |
| 49 | TEENS      | 4594                | 12                | 14                 | 2                       | *CES-D                | Y                          | Low                    |
| 29 | LSAC       | 3956                | 12                | 16                 | 4                       | *SMFQ                 | Y                          | Low                    |
| 93 | LSAC       | 3885                | 13                | 15                 | 2                       | *SMFQ                 | N                          | Low                    |
| 48 | Add Health | 3676                | 15                | 28                 | 13                      | *CES-D                | Y                          | Low                    |
| 43 | CRYF       | 3596                | 9-18              | 35-50              | 32                      | *MDI                  | Y                          | Low                    |
| 78 | MUSP       | 3493                | 14                | 21                 | 7                       | *CIDI                 | Y                          | Low                    |
| 24 | COMPASS    | 3173                | 14-18             | 15-19              | 1                       | *CES-D                | N                          | Low                    |
| 77 | EDSP       | 2548                | 14-24             | 22-32              | 8                       | *CIDI                 | Y                          | Low                    |
| 32 | MCS        | 2416                | 7                 | 14                 | 7                       | *SMFQ                 | Y                          | Low                    |
| 55 | COMPASS    | 2292                | 15-17             | 16-18              | 1                       | *CES-D                | N                          | Low                    |
| 73 | TRAILS     | 2230                | 11                | 16                 | 5                       | *YSR; *CBC            | Y                          | Low                    |
| 21 | Add Health | 2197                | 12-17             | 24-32              | 14                      | *CES-D                | N                          | Low                    |
| 79 | YAMHS      | 2175                | 14                | 15                 | 1                       | *SMFQ                 | Y                          | Low                    |
| 88 | KCYPS      | 2092                | 13                | 15                 | 2                       | *KEBPS                | Y                          | Low                    |
| 26 | HUNT       | 2000                | 12-17             | 17-19              | 5                       | *HSCL                 | N                          | Low                    |



|     |                    |       |       |       |     |                                |   |          |
|-----|--------------------|-------|-------|-------|-----|--------------------------------|---|----------|
| 58  | HUNT               | 1869  | 13-19 | 23-31 | 10  | *CONOR-MHI                     | Y | Low      |
| 35  | Raine              | 1679  | 5     | 20    | 15  | *DASS-21                       | Y | Low      |
| 47  | CDAH               | 1630  | 12-15 | 29-35 | 20  | *CIDI                          | N | Low      |
| 34  | VestLiv            | 1589  | 14-15 | 20-21 | 6   | *CES-D                         | Y | Low      |
| 57  | QLSCD              | 1516  | 7     | 8     | 1   | *SBQ                           | Y | Low      |
| 17  | RELACHS            | 1513  | 11-14 | 13-16 | 2   | *SMFQ                          | N | Low      |
| 11  | QLSCD              | 1492  | 6     | 12    | 6   | *SBQ; *PBQ                     | Y | Low      |
| 95  | QLSCD              | 1438  | 5     | 10    | 5   | *SBQ                           | Y | Low      |
| 37  | SALVe              | 1428  | 14    | 17    | 3   | *DSRS                          | Y | Low      |
| 13  | HUNT               | 1417  | 12-13 | 17-19 | 5   | *HSCL                          | N | Low      |
| 75  | TRAILS             | 1396  | 14    | 19    | 5   | *CIDI                          | N | Low      |
| 56  | QLSCD              | 1250  | 8     | 10    | 2   | *PBQ; *CBC                     | Y | Low      |
| 31  | REAL               | 1160  | 12-15 | 17-20 | 11  | *CDI                           | N | Low      |
| 65  | UP&DOWN            | 1099  | 8-18  | 10-20 | 2   | *PANAS                         | N | Low      |
| 84  | CAB                | 1065  | 12-15 | 14-17 | 2   | *HSCL                          | Y | Low      |
| 100 | SSP                | 998   | 12-14 | 13-15 | 1   | *CES-D                         | N | Low      |
| 9   | NLHB               | 924   | 13    | 23    | 10  | 7-items: depressed mood        | N | Low      |
| 71  | ABC                | 871   | 11    | 16    | 5   | *CES-D                         | N | Low      |
| 14  | NDIT               | 816   | 12    | 20    | 8   | *MDI                           | N | Low      |
| 80  | ROOTS              | 736   | 15    | 18    | 3   | *SMFQ; *SADSSAC                | N | Low      |
| 4   | VHYS               | 662   | 12-18 | 22-29 | 10  | *BCFPI                         | Y | Low      |
| 28  | n/a (Primary Data) | 525   | 13-14 | 16-17 | 3   | *CDI                           | Y | Low      |
| 38  | n/a (Primary Data) | 496   | 11-15 | 17-21 | 6   | *SADSSAC                       | Y | Low      |
| 12  | NANS               | 17550 | 12-15 | 13-16 | 1   | *CES-D                         | N | Very Low |
| 15  | Add Health         | 6504  | 12-17 | 18-26 | 7   | *CES-D                         | Y | Very Low |
| 2   | 4-H                | 5961  | 13    | 21    | 8   | *CES-D                         | Y | Very Low |
| 98  | Add Health         | 2353  | 12-17 | 24-32 | 14  | *Diagnosis; 1-item: depression | N | Very Low |
| 36  | Raine              | 1628  | 8     | 22    | 14  | *DASS-21                       | Y | Very Low |
| 18  | NPHS               | 1137  | 16-17 | 18-23 | 6   | *CIDI                          | Y | Very Low |
| 45  | PSID               | 1115  | 12-18 | 18-24 | 6   | *KPDS                          | N | Very Low |
| 30  | MATCH              | 932   | 9-13  | 13-17 | 4   | *PedsQL                        | N | Very Low |
| 6   | MSLT               | 900   | 15    | 24    | 9   | 3-items: depressed mood        | N | Very Low |
| 16  | Missing            | 744   | 12-13 | 13-14 | 1.5 | *CES-D                         | Y | Very Low |

|    |                    |     |       |       |   |          |   |          |
|----|--------------------|-----|-------|-------|---|----------|---|----------|
| 94 | n/a (Primary Data) | 558 | 12-17 | 13-18 | 1 | *HADS    | N | Very Low |
| 68 | n/a (Primary Data) | 479 | 16    | 20    | 4 | *SADSSAC | Y | Very Low |
| 20 | n/a (Primary Data) | 362 | 13    | 16    | 3 | *CDI     | N | Very Low |
| 59 | n/a (Primary Data) | 277 | 12    | 15    | 3 | *CES-D   | Y | Very Low |
| 60 | n/a (Primary Data) | 173 | 13    | 15    | 2 | *CES-D   | Y | Very Low |
| 81 | GOALS              | 158 | 14    | 15    | 1 | *CES-D   | N | Very Low |

271 \*Measure has been previously validated. Datasets: 4-H 4-H Study of Positive Youth Development, ABC Auckland Birthweight Collaborative Study, Add Health The  
272 National Longitudinal Study of Adolescent Health, ALSPAC Avon Longitudinal Study of Parents And their Children, CAB Childhood and Beyond Study, CDAH  
273 Childhood Determinants of Adult Health Study, CLASS 2003 Children's Lifestyle and School Performance Study, COMPASS Cannabis use, Obesity, Mental health,  
274 Physical activity, Alcohol use, Smoking, and Sedentary behaviour study, CRYF Cardiovascular Risk in Young Finns Study, EDSP Early Developmental Stages of  
275 Psychopathology, FLUPPY The FLUPPY Program, GOALS The GOALS Study, HUNT The Trøndelag Health Study, KCYPS Korean Children and Youth Panel  
276 Survey, LOOK Lifestyle of our Kids Study, LSAC Longitudinal Study of Australian Children, MATCH Monitoring Activities of Teenagers to Comprehend their  
277 Habits Study, MCS Millennium Cohort Study, MSLT Michigan Study of Life Transitions, MUSP Mater University of Queensland Study of Pregnancy, NANS New  
278 Approaches, New Solutions, NCDS The 1958 National Child Development Survey, NDIT Nicotine Dependence in Teens Study, NLHB Norwegian Longitudinal  
279 Health Behaviour Study, NPHS National Population Health Survey, PSID Panel Study of Income Dynamics, QLSCD Quebec Longitudinal Study of Child  
280 Development, Raine The Raine Study, REAL Research on Eating and Adolescent Lifestyles Study, RELACHS Research with East London Adolescents: Community  
281 Health Survey, ROOTS The ROOTS Study, SALVe The SALVe Cohort, SSP The Seven Schools Project, TEENS The TEENS Study, TRAILS The Trails Study,  
282 UP&DOWN The Up and Down project, VHYS Victoria Health Youth Survey, YAMHS Youth and Mental Health Study. Measures: BCFPI Brief Child and Family  
283 Phone Interview, CBC Child Behaviour Checklist CDI Child Depression Inventory, CES-D Centre for Epidemiological Studies Depression Scale, CIDI Composite  
284 International Diagnostic Interview, CIHIDAD Canadian Institute for Health Information Discharge Abstract Database, CIS Clinical Interview Schedule, CONOR-  
285 MHI Cohort of Norway Mental Health Index, DASS-21 Depression Anxiety Stress Scales, DSRS Depression Self-Rating Scale, HADS Hospital Anxiety and  
286 Depression Scale, HSCL Hopkins Symptom Checklist, KEBPS Korean Emotional Behavioural Problem Scale, KPDS Kessler's Non-Specific Psychological Distress  
287 Scale, Malaise The Malaise Inventory, MDI Major Depression Inventory, MSID Medical Services Insurance Database, PANAS Positive and Negative Affect  
288 Schedule, PBQ Preschool Behaviour Questionnaire, PedsQL Pediatric Quality of Life Inventory, SADSSAC Schedule for Affective Disorders and Schizophrenia for  
289 School-Age Children, SBQ Social Behaviour Questionnaire, SMFQ Short Mood and Feelings Questionnaire, YSR Youth Self-Report

290 **Table 3**  
 291 *Studies investigating associations between physical activity and anxiety*

| ID | Dataset              | Participants<br>(n) | Age<br>(Baseline) | Age<br>(Follow-Up) | Study Length<br>(Years) | Measure (Subscale)        | Evidence of<br>Association | Quality of<br>Evidence |
|----|----------------------|---------------------|-------------------|--------------------|-------------------------|---------------------------|----------------------------|------------------------|
| 87 | CLASS                | 4861                | 10                | 18                 | 8                       | MSID; CIHIDAD             | Y                          | High                   |
| 8  | AHEAD                | 673                 | 13                | 15-16              | 3                       | *SDQ (Emotional Symptoms) | Y                          | High                   |
| 3  | MCS                  | 6153                | 7                 | 11                 | 4                       | *SDQ (Emotional Symptoms) | N                          | Moderate               |
| 91 | MCS                  | 4599                | 14                | 17                 | 3                       | *SDQ (Emotional Symptoms) | Y                          | Moderate               |
| 99 | FLUPPY               | 785                 | 6                 | 10                 | 4                       | *TRF                      | Y                          | Moderate               |
| 50 | NDIT                 | 733                 | 12                | 20                 | 8                       | CCHS                      | Y                          | Moderate               |
| 97 | COMPASS              | 23,395              | 14-18             | 15-19              | 1                       | *GAD-7                    | Y                          | Low                    |
| 25 | Add Health           | 4888                | 12-17             | 24-32              | 13                      | Clinical Diagnosis        | Y                          | Low                    |
| 42 | ALSPAC               | 4257                | 12                | 18                 | 6                       | *CIS                      | Y                          | Low                    |
| 29 | LSAC                 | 3956                | 12                | 16                 | 4                       | *SCAS                     | Y                          | Low                    |
| 93 | LSAC                 | 3885                | 13                | 15                 | 2                       | *PedsQL (Emotional)       | Y                          | Low                    |
| 78 | MUSP                 | 3493                | 14                | 21                 | 7                       | *CIDI                     | N                          | Low                    |
| 24 | COMPASS              | 3173                | 14-18             | 15-19              | 1                       | *GAD-7                    | N                          | Low                    |
| 77 | EDSP                 | 2548                | 14-24             | 22-32              | 8                       | *CIDI                     | Y                          | Low                    |
| 64 | HUBRO                | 2433                | 15-16             | 18-19              | 3                       | *SDQ (Emotional Symptoms) | Y                          | Low                    |
| 21 | Add Health           | 2197                | 12-17             | 24-32              | 14                      | Clinical Diagnosis        | N                          | Low                    |
| 88 | KCYPS                | 2092                | 13                | 15                 | 2                       | *KEBPS                    | Y                          | Low                    |
| 26 | HUNT                 | 2000                | 12-17             | 17-19              | 5                       | *HSCL                     | N                          | Low                    |
| 58 | HUNT                 | 1869                | 13-19             | 23-31              | 10                      | *CONOR-MHI                | Y                          | Low                    |
| 35 | Raine                | 1679                | 5                 | 20                 | 15                      | *DASS-21                  | N                          | Low                    |
| 11 | QLSCD                | 1492                | 6                 | 12                 | 6                       | *SBQ; *PBQ                | Y                          | Low                    |
| 85 | n/a (Secondary Data) | 1446                | 11-14             | 12-15              | 1                       | *SDQ (Emotional Symptoms) | Y                          | Low                    |
| 95 | QLSCD                | 1438                | 5                 | 10                 | 5                       | *SBQ                      | Y                          | Low                    |
| 37 | SALVe                | 1428                | 14                | 17                 | 3                       | *SCAS                     | N                          | Low                    |
| 13 | HUNT                 | 1417                | 12-13             | 17-19              | 5                       | *HSCL                     | N                          | Low                    |
| 31 | REAL                 | 1160                | 12-15             | 17-20              | 11                      | *MASC                     | N                          | Low                    |
| 5  | NDIT                 | 781                 | 12                | 20                 | 8                       | CCHS                      | Y                          | Low                    |
| 12 | NANS                 | 17550               | 12-15             | 13-16              | 1                       | *SCAS (Social Anxiety)    | Y                          | Very Low               |

|    |                    |      |       |       |    |                           |   |          |
|----|--------------------|------|-------|-------|----|---------------------------|---|----------|
| 36 | Raine              | 1628 | 8     | 22    | 14 | *DASS-21                  | N | Very Low |
| 45 | PSID               | 1115 | 12-18 | 18-24 | 6  | *KPDS                     | N | Very Low |
| 30 | MATCH              | 932  | 9-13  | 13-17 | 4  | *PedsQL (Emotional)       | N | Very Low |
| 6  | MSLT               | 900  | 15    | 24    | 9  | 3-items measuring worry   | N | Very Low |
| 51 | MoMo               | 686  | 6     | 17    | 11 | *SDQ (Emotional Symptoms) | N | Very Low |
| 94 | n/a (Primary Data) | 558  | 12-17 | 13-18 | 1  | *HADS                     | N | Very Low |
| 67 | n/a (Primary Data) | 145  | 7-9   | 8-10  | 1  | *SPAIC; *PQSACY; *TRF     | Y | Very Low |

292 \*Measure has been previously validated. Datasets: *Add Health* The National Longitudinal Study of Adolescent Health, *AHEAD* Activity and Healthy Eating in  
293 Adolescence, *ALSPAC* Avon Longitudinal Study of Parents And their Children, *CLASS* 2003 Children's Lifestyle and School Performance Study, *COMPASS*  
294 Cannabis use, Obesity, Mental health, Physical activity, Alcohol use, Smoking, and Sedentary behaviour study, *EDSP* Early Developmental Stages of  
295 Psychopathology, *FLUPPY* The FLUPPY Program, *HUBRO* Oslo Health Study, *HUNT* The Trøndelag Health Study, *KCYPS* Korean Children and Youth  
296 Panel Survey, *LSAC* Longitudinal Study of Australian Children, *MATCH* Monitoring Activities of Teenagers to Comprehend their Habits Study, *MCS*  
297 Millennium Cohort Study, *MoMo* German Motorik-Modul Longitudinal Study, *MSLT* Michigan Study of Life Transitions, *MUSP* Mater University of  
298 Queensland Study of Pregnancy, *NANS* New Approaches, New Solutions, *NDIT* Nicotine Dependence in Teens Study, *PSID* Panel Study of Income  
299 Dynamics, *QLSCD* Quebec Longitudinal Study of Child Development, *Raine* The Raine Study, *REAL* Research on Eating and Adolescent Lifestyles Study,  
300 *SALVe* The SALVe Cohort. Measures: *CCHS* Canadian Community Health Survey 2003, *CIDI* Composite International Diagnostic Interview, *CIHIDAD*  
301 Canadian Institute for Health Information Discharge Abstract Database, *CIS* Clinical Interview Schedule, *CONOR-MHI* Cohort of Norway Mental Health  
302 Index, *DASS-21* Depression Anxiety Stress Scales, *GAD-7* Generalized Anxiety Disorder Assessment, *HADS* Hospital Anxiety and Depression Scale, *HSCL*  
303 Hopkins Symptom Checklist, *KEBPS* Korean Emotional Behavioural Problem Scale, *KPDS* Kessler's Non-Specific Psychological Distress Scale, *MASC*  
304 Multidimensional Anxiety Scale for Children, *MSID* Medical Services Insurance Database, *PBQ* Preschool Behaviour Questionnaire, *PedsQL* Pediatric  
305 Quality of Life Inventory, *PQSACY* Parents Questionnaire for Social Anxiety in Children and Youth, *SBQ* Social Behaviour Questionnaire, *SCAS* Spence  
306 Children's Anxiety Scale, *SDQ* Strengths and Difficulties Questionnaire, *SPAIC* Social Phobia and Anxiety Inventory for Children, *TRF* Teacher Report Form

307 **Table 4**  
 308 *Studies investigating associations between physical activity and indicators of wellbeing*

| ID                 | Dataset            | Participants<br>(n) | Age<br>(Baseline) | Age<br>(Follow-Up) | Study Length<br>(Years) | Measure (Subscale)             | Evidence of<br>Association | Quality of<br>Evidence |
|--------------------|--------------------|---------------------|-------------------|--------------------|-------------------------|--------------------------------|----------------------------|------------------------|
| 54 <sup>b</sup>    | PRALIMAP           | 1445                | 14-18             | 16-20              | 2                       | *Duke Health Profile (Social)  | Y                          | High                   |
| 8 <sup>b, d</sup>  | AHEAD              | 673                 | 13                | 15-16              | 3                       | *SDQ (Peer Relations); *WEMWBS | N                          | High                   |
| 61 <sup>c</sup>    | Add Health         | 13,426              | 12-17             | 13-18              | 1                       | *RSE                           | Y                          | Moderate               |
| 3 <sup>b</sup>     | MCS                | 6153                | 7                 | 11                 | 4                       | *SDQ (Peer Relations)          | Y                          | Moderate               |
| 72 <sup>c</sup>    | HSBS               | 10536               | 15-17             | 21-23              | 6                       | *RSE                           | N                          | Low                    |
| 19 <sup>c</sup>    | Add Health         | 10500               | 12-17             | 13-21              | 1                       | 4 items: Self-Esteem           | Y                          | Low                    |
| 89 <sup>a</sup>    | Active NZ          | 6725                | 11-17             | 14-21              | 3                       | 1-item: Subjective Wellbeing   | Y                          | Low                    |
| 44 <sup>c</sup>    | Add Health         | 5399                | 12-17             | 21-26              | 7                       | 4 items: Self-Esteem           | Y                          | Low                    |
| 29 <sup>b</sup>    | LSAC               | 3956                | 12                | 16                 | 4                       | *SDQ (Peer Relations)          | N                          | Low                    |
| 93 <sup>b</sup>    | LSAC               | 3885                | 13                | 15                 | 2                       | *PedsQL (Social)               | Y                          | Low                    |
| 69 <sup>a</sup>    | KCYPS              | 3188                | 14                | 15                 | 1                       | 3 items: Life Satisfaction     | Y                          | Low                    |
| 24 <sup>d</sup>    | COMPASS            | 3173                | 14-18             | 15-19              | 1                       | *FS-8                          | Y                          | Low                    |
| 64 <sup>b</sup>    | HUBRO              | 2433                | 15-16             | 18-19              | 3                       | *SDQ (Peer Relations)          | N                          | Low                    |
| 7 <sup>b</sup>     | PHAST              | 2278                | 10                | 14                 | 4                       | *HSPP (Social Competence)      | Y                          | Low                    |
| 88 <sup>a</sup>    | KCYPS              | 2092                | 13                | 15                 | 2                       | *SLSS                          | N                          | Low                    |
| 58 <sup>a</sup>    | HUNT               | 1869                | 13-19             | 23-31              | 10                      | 1 item: Life Satisfaction      | Y                          | Low                    |
| 1 <sup>c</sup>     | n/a (Primary Data) | 1492                | 14                | 17                 | 3                       | *RSE                           | N                          | Low                    |
| 13 <sup>a</sup>    | HUNT               | 1417                | 12-13             | 17-19              | 5                       | 3 items: Subjective Wellbeing  | Y                          | Low                    |
| 83 <sup>c</sup>    | n/a (Primary Data) | 1174                | 10-16             | 13-19              | 3                       | *HSPP (Global Self-Worth)      | Y                          | Low                    |
| 65 <sup>a</sup>    | UP&DOWN            | 1099                | 8-18              | 10-20              | 2                       | *PANAS                         | Y                          | Low                    |
| 100 <sup>c</sup>   | SSP                | 998                 | 12-14             | 13-15              | 1                       | *RSE                           | Y                          | Low                    |
| 27 <sup>a</sup>    | n/a (Primary Data) | 714                 | 13-16             | 14-17              | 1                       | *SLS                           | Y                          | Low                    |
| 92 <sup>d</sup>    | n/a (Primary Data) | 599                 | 13                | 15                 | 2                       | *WEMWBS                        | N                          | Low                    |
| 23 <sup>d</sup>    | MATCH              | 318                 | 10                | 16                 | 6                       | *MHC-SF                        | Y                          | Low                    |
| 66 <sup>c</sup>    | NEEDS              | 197                 | 9                 | 13                 | 4                       | *HSPP (Global Self-Worth)      | Y                          | Low                    |
| 52 <sup>c</sup>    | MAS                | 184                 | 4-7               | 7-9                | 2                       | *HSPP (Global Self-Worth)      | Y                          | Low                    |
| 62 <sup>b</sup>    | n/a (Primary Data) | 115                 | 13                | 14                 | 1                       | *KIDSCREEN-27                  | N                          | Low                    |
| 76 <sup>b, c</sup> | GUTS               | 8670                | 10-15             | 12-18              | 2                       | *HSPP (GSW; Social Competence) | Y                          | Very Low               |

|                    |                    |      |       |       |    |                             |   |          |
|--------------------|--------------------|------|-------|-------|----|-----------------------------|---|----------|
| 46 <sup>c</sup>    | NELS               | 4757 | 15    | 17    | 2  | 7 items: Self-Esteem        | Y | Very Low |
| 45 <sup>d</sup>    | PSID               | 1115 | 12-18 | 18-24 | 6  | *MHC-SF                     | Y | Very Low |
| 70 <sup>c</sup>    | CAB                | 987  | 7-10  | 8-11  | 1  | *HSPP (Global Self-Worth)   | Y | Very Low |
| 30 <sup>b</sup>    | MATCH              | 932  | 9-13  | 13-17 | 4  | *PedsQL (Social)            | Y | Very Low |
| 6 <sup>c</sup>     | MSLT               | 900  | 15    | 24    | 9  | 3 items: Self-Esteem        | N | Very Low |
| 40 <sup>a</sup>    | HCS                | 706  | 8-21  | 31-44 | 24 | 3 items: Life Satisfaction  | N | Very Low |
| 51 <sup>b</sup>    | MoMo               | 686  | 6     | 17    | 11 | *SDQ (Peer Relations)       | Y | Very Low |
| 22 <sup>d</sup>    | MATCH              | 424  | 10    | 16    | 6  | *MHC-SF                     | N | Very Low |
| 33 <sup>b</sup>    | PALS               | 310  | 7-18  | 29-41 | 22 | *SF-36 (Social Functioning) | N | Very Low |
| 81 <sup>c</sup>    | GOALS              | 158  | 14    | 15    | 1  | *RSE                        | N | Very Low |
| 82 <sup>b, c</sup> | n/a (Primary Data) | 134  | 7-9   | 8-10  | 1  | *KINDLR                     | N | Very Low |

309 \*Measure has been previously validated. <sup>a</sup>Positive Emotions, <sup>b</sup>Positive Relations, <sup>c</sup>Self-Esteem, <sup>d</sup>Overall Wellbeing/Flourishing. Datasets: Active-NZ Active New  
310 Zealand Survey, Add Health The National Longitudinal Study of Adolescent Health, AHEAD Activity and Healthy Eating in Adolescence, CAB Childhood and  
311 Beyond Study, COMPASS Cannabis use, Obesity, Mental health, Physical activity, Alcohol use, Smoking, and Sedentary behaviour study, GOALS The GOALS  
312 Study, GUTS Growing Up Today Study, HCS The Healthy Child Study, HSBS The High School and Beyond Survey, HUBRO Oslo Health Study, HUNT The  
313 Trøndelag Health Study, KCYPS Korean Children and Youth Panel Survey, LSAC Longitudinal Study of Australian Children, MAS The Move-Along Study,  
314 MATCH Monitoring Activities of Teenagers to Comprehend their Habits Study, MCS Millennium Cohort Study, MoMo German Motorik-Modul Longitudinal  
315 Study, MSLT Michigan Study of Life Transitions, NEEDS The Girls' Needs Project, NELS The National Education Longitudinal Study of 1988, PALS Physical  
316 Activity Longitudinal Study, PHAST Physical Health and Activity Study Team project, PRALIMAP PRomotion de l'ALIMentation et de l'Activité Physique trial,  
317 PSID Panel Study of Income Dynamics, SSP The Seven Schools Project, UP&DOWN The Up and Down project. Measures: FS-8 Flourishing Scale, HSPP Harter's  
318 Self-Perception Profile, KINDLR KINDer Lebensqualitätsfrageogen, MHC-SF Mental Health Continuum-Short Form, PANAS Positive and Negative Affect  
319 Schedule, PedsQL Pediatric Quality of Life Inventory, RSE Rosenberg Self-Esteem Scale, SDQ Strengths and Difficulties Questionnaire, SF-36 Medical Outcomes  
320 Study Short Form-36, SLS Satisfaction with Life Scale, SLSS Students' Life Satisfaction Scale, WEMWBS Warwick-Edinburgh Mental Well-being Scale

321 Indicators of wellbeing were mostly measured using subscales of larger questionnaires  
322 typically used to quantify a range of outcomes both related and unrelated to mental health. The  
323 FS-8 [52], KINDL-R [53], WEMWBS [54] and MHC-SF [10] were the only dedicated  
324 wellbeing/flourishing scales that targeted elements of social, emotional and psychological  
325 wellbeing simultaneously. These scales were relatively underutilised, appearing in only 7/39  
326 (17.9%) wellbeing studies combined<sup>(8, 22, 23, 24, 45, 82, 92)</sup>. The RSE<sup>(1, 61, 72, 81, 100)</sup> [55] and/or HSPP  
327 Global Self-Worth subscale<sup>(52, 66, 70, 76, 83)</sup> [56], and the SDQ Peer Relationships subscale<sup>(3, 8, 29, 51,</sup>  
328 <sup>64)</sup> [51] were the most common measures of self-esteem (psychological wellbeing) and positive  
329 relationships (social wellbeing), respectively. Positive emotions (emotional wellbeing) were only  
330 investigated using validated questionnaires in three studies using the SLS<sup>(27)</sup> [57], SLSS<sup>(88)</sup> [58]  
331 and the PANAS Positive Affect subscale<sup>(65)</sup> [59]. Additional studies measured emotional  
332 wellbeing via (to the best of our knowledge) unvalidated items, so findings should be treated with  
333 caution<sup>(13, 40, 58, 69, 89)</sup>.

## 334 **Results of synthesis**

335 To address our primary research questions, studies are grouped by mental health outcome  
336 into SoF tables structured in order of quality of evidence and sample size (see Tables 2-7). Studies  
337 investigating multiple outcomes are reported in all relevant tables. Baseline age represents the age  
338 at which PA data was first collected whilst follow-up age represents the age participants last  
339 reported on their mental health.

340 **Table 5**  
 341 *Effects sizes in moderate- and high-quality depression studies*

| ID | Predictor                                                         | Outcome                                                    | Measure of Effect        | Results (unadjusted) | Results (adjusted)    | Comments                                                            |
|----|-------------------------------------------------------------------|------------------------------------------------------------|--------------------------|----------------------|-----------------------|---------------------------------------------------------------------|
| 90 | Inactive (ref) vs Active age 7 years                              | Depressive Symptoms from 23-62                             | Hazard Ratio (HR), 95%CI | .85<br>[.68 to 1.08] | .81<br>[.55 to 1.18]  | No difference                                                       |
|    | Inactive (ref) vs Active age 11 years                             | Depressive Symptoms from 23-62                             | Hazard Ratio (HR), 95%CI | .91<br>[.78 to 1.07] | .96<br>[.75 to 1.22]  | No difference                                                       |
|    | Inactive (ref) vs Active age 16 years                             | Depressive Symptoms from 23-62                             | Hazard Ratio (HR), 95%CI | .75<br>[.68 to .83]  | .73<br>[.62 to .85]   | 27% less risk of elevated depressive symptoms                       |
| 87 | Weekly PA without coach: Never (ref) vs. 1-3 times age 10 (boys)  | (Time until) diagnosis of internalizing disorder or age 18 | Hazard Ratio (HR), 95%CI | n/a                  | .78<br>[.54 to 1.14]  | No difference                                                       |
|    | Weekly PA without coach: Never (ref) vs. 4+ times age 10 (boys)   | (Time until) diagnosis of internalizing disorder or age 18 | Hazard Ratio (HR), 95%CI | n/a                  | .98<br>[.69 to 1.38]  | No difference                                                       |
|    | Weekly PA with coach: Never (ref) vs. 1-3 times age 10 (boys)     | (Time until) diagnosis of internalizing disorder or age 18 | Hazard Ratio (HR), 95%CI | n/a                  | .85<br>[.68 to 1.08]  | No difference                                                       |
|    | Weekly PA with coach: Never (ref) vs. 4+ times age 10 (boys)      | (Time until) diagnosis of internalizing disorder or age 18 | Hazard Ratio (HR), 95%CI | n/a                  | .73<br>[.55 to .98]   | 27% less risk of receiving a diagnosis of an internalizing disorder |
|    | Weekly PA without coach: Never (ref) vs. 1-3 times age 10 (girls) | (Time until) diagnosis of internalizing disorder or age 18 | Hazard Ratio (HR), 95%CI | n/a                  | .80<br>[.61 to 1.06]  | No difference                                                       |
|    | Weekly PA without coach: Never (ref) vs. 4+ times age 10 (girls)  | (Time until) diagnosis of internalizing disorder or age 18 | Hazard Ratio (HR), 95%CI | n/a                  | .77<br>[.59 to 1.02]  | No difference                                                       |
|    | Weekly PA with coach: Never (ref) vs. 1-3 times age 10 (girls)    | (Time until) diagnosis of internalizing disorder or age 18 | Hazard Ratio (HR), 95%CI | n/a                  | 1.03<br>[.86 to 1.23] | No difference                                                       |



|    |                                                                        |                                                            |                                         |                        |                                |                                                                                      |
|----|------------------------------------------------------------------------|------------------------------------------------------------|-----------------------------------------|------------------------|--------------------------------|--------------------------------------------------------------------------------------|
|    | Weekly PA with coach: Never (ref) vs. 4+ times age 10 (girls)          | (Time until) diagnosis of internalizing disorder or age 18 | Hazard Ratio (HR), 95%CI                | n/a                    | .92<br>[.71 to 1.18]           | No difference                                                                        |
| 61 | Times engaging in PA in past week during adolescence (12-17) (males)   | Depressive Symptoms after one year                         | Unstandardized Beta (B), (SE), <i>p</i> | n/a                    | -.125 (.027)<br><i>p</i> < .01 | Each additional bout of weekly PA had a small negative effect on depressive symptoms |
|    | Times engaging in PA in past week during adolescence (12-17) (females) | Depressive Symptoms after one year                         | Unstandardized Beta (B), (SE), <i>p</i> | n/a                    | -.040 (.039)<br><i>p</i> > .10 | No difference                                                                        |
| 96 | MVPA Guidelines: Didn't Meet (ref) vs. Met in Adolescence (12-17)      | Depressive symptoms or disorder age 33-39                  | Incidence Rate Ratio (IRR), 95%CI       | n/a                    | .84<br>[.72 to .98]            | 16% lower incidence of depression                                                    |
|    | MVPA Guidelines: Never Met (ref) vs. Met in Adolescence (12-17)        | Depressive symptoms or disorder age 33-39                  | Incidence Rate Ratio (IRR), 95%CI       | n/a                    | 1.02<br>[.86 to 1.08]          | No difference                                                                        |
|    | MVPA Guidelines: Never Met (ref) vs. Met in Adulthood (33-39)          | Depressive symptoms or disorder age 33-39                  | Incidence Rate Ratio (IRR), 95%CI       | n/a                    | .91<br>[.77 to .99]            | 9% lower incidence of depression                                                     |
|    | MVPA Guidelines: Never Met (ref) vs. Consistently Met (12-17 & 33-39)  | Depressive symptoms or disorder age 33-39                  | Incidence Rate Ratio (IRR), 95%CI       | n/a                    | .56<br>[.40 to .79]            | 44% lower incidence of depression                                                    |
| 41 | PA: Total counts age 12 (per 100)                                      | Depressive symptoms age 18                                 | Incidence Rate Ratio (IRR), 95%CI       | .910<br>[.882 to .939] | .941<br>[.910 to .972]         | Additional 100 counts of daily activity associated with 5.9% reduction in depression |
|    | PA: Total counts age 14 (per 100)                                      | Depressive symptoms age 18                                 | Incidence Rate Ratio (IRR), 95%CI       | .933<br>[.902 to .965] | .965<br>[.932 to .999]         | Additional 100 counts of daily activity associated with 3.5% reduction in depression |
|    | PA: Total counts age 16 (per 100)                                      | Depressive symptoms age 18                                 | Incidence Rate Ratio (IRR), 95%CI       | .939<br>[.896 to .983] | .984<br>[.937 to 1.033]        | No difference in fully adjusted model                                                |
|    | Light PA age 12 (per 60mins)                                           | Depressive symptoms age 18                                 | Incidence Rate Ratio (IRR), 95%CI       | .883<br>[.834 to .933] | .904<br>[.850 to .961]         | Additional 60mins light activity associated with 9.6% reduction in depression        |

|                                                                            |                            |                                         |                          |                          |                                                                                            |
|----------------------------------------------------------------------------|----------------------------|-----------------------------------------|--------------------------|--------------------------|--------------------------------------------------------------------------------------------|
| Light PA age 14 (per 60mins)                                               | Depressive symptoms age 18 | Incidence Rate Ratio (IRR), 95%CI       | .908<br>[.851 to .970]   | .922<br>[.857 to .992]   | Additional 60mins light activity associated with 7.8% reduction in depression              |
| Light PA age 16 (per 60mins)                                               | Depressive symptoms age 18 | Incidence Rate Ratio (IRR), 95%CI       | .882<br>[.810 to .961]   | .889<br>[.809 to .974]   | Additional 60mins light activity associated with 11.1% reduction in depression             |
| MVPA age 12 (per 15mins)                                                   | Depressive symptoms age 18 | Incidence Rate Ratio (IRR), 95%CI       | .848<br>[.863 to .965]   | .910<br>[.857 to .966]   | Additional 15mins MVPA associated with 9.0% reduction in depression                        |
| MVPA age 14 (per 15mins)                                                   | Depressive symptoms age 18 | Incidence Rate Ratio (IRR), 95%CI       | .913<br>[.863 to .965]   | .960<br>[.905 to 1.018]  | No difference in fully adjusted model                                                      |
| MVPA age 16 (per 15mins)                                                   | Depressive symptoms age 18 | Incidence Rate Ratio (IRR), 95%CI       | .938<br>[.883 to .997]   | 1.001<br>[.936 to 1.071] | No difference in fully adjusted model                                                      |
| Total counts: Persistently Low vs. Persistently High from age 12-16        | Depressive symptoms age 18 | Incidence Rate Ratio (IRR), 95%CI       | .934<br>[.823 to 1.060]  | n/a                      | No difference                                                                              |
| Light: Persistently Low (ref) vs. Persistently Average from age 12-16      | Depressive symptoms age 18 | Incidence Rate Ratio (IRR), 95%CI       | .936<br>[.843 to 1.040]  | n/a                      | No difference                                                                              |
| Light: Persistently Low (ref) vs. Persistently High from age 12-16         | Depressive symptoms age 18 | Incidence Rate Ratio (IRR), 95%CI       | .804<br>[.652 to .990]   | n/a                      | Persistently high levels of light activity associated with 19.6% fewer depressive symptoms |
| MVPA: Persistently Low (ref) vs. Persistently Above Average from age 12-16 | Depressive symptoms age 18 | Incidence Rate Ratio (IRR), 95%CI       | 1.006<br>[.884 to 1.145] | n/a                      | No difference                                                                              |
| MVPA: Persistently Low (ref) vs. Persistently High from age 12-16          | Depressive symptoms age 18 | Incidence Rate Ratio (IRR), 95%CI       | .699<br>[.515 to .950]   | n/a                      | Persistently high levels of MVPA associated with 30.1% fewer depressive symptoms           |
| 63 Years of school sport (team) from age 12-17                             | Depressive Symptoms age 20 | Standardized Beta ( $\beta$ ), <i>p</i> | n/a                      | -.09<br><i>p</i> < .05   | Small negative association between years of team sport and depressive symptoms             |

|    |                                                                       |                                      |                                      |           |                        |                                                                             |
|----|-----------------------------------------------------------------------|--------------------------------------|--------------------------------------|-----------|------------------------|-----------------------------------------------------------------------------|
|    | Years of school sport (individual) from age 12-17                     | Depressive Symptoms age 20           | Standardized Beta ( $\beta$ ), $p$   | n/a       | .01<br>$p > .05$       | No effect                                                                   |
| 39 | Years of adolescent school sport (any) from age 12-17                 | Depressive Symptoms age 20           | Standardized Beta ( $\beta$ ), $p$   | n/a       | -.09<br>$p < .05$      | Years of sport had small negative association with depressive symptoms      |
| 53 | Specialist Taught vs. Regular PE age 8: end of 12-month intervention  | Change in depressive symptoms age 9  | $p$                                  | $p > .05$ | n/a                    | No difference                                                               |
|    | Specialist Taught vs. Regular PE age 8: after 4 years                 | Change in depressive symptoms age 12 | $p$                                  | $p > .05$ | n/a                    | No difference                                                               |
| 99 | All Sport: Low (ref) vs. High trajectory from age 6-10                | Depressive symptoms age 10           | Standardized Beta ( $\beta$ ), 95%CI | n/a       | -.10<br>[-.18 to -.02] | Small negative effect of high sport trajectory on depressive symptoms       |
|    | High Team (ref) vs. High Individual sport participation from age 6-10 | Depressive symptoms age 10           | Standardized Beta ( $\beta$ ), 95%CI | n/a       | .05<br>[-.05 to .16]   | No difference                                                               |
|    | Team Sport: Low (ref) vs High trajectory from age 6-10                | Depressive symptoms age 10           | Standardized Beta ( $\beta$ ), 95%CI | n/a       | -.12<br>[-.20 to -.03] | Small negative effect of high team sports trajectory on depressive symptoms |
|    | Individual Sport: Low (ref) vs. High trajectory from age 6-10         | Depressive symptoms age 10           | Standardized Beta ( $\beta$ ), 95%CI | n/a       | -.05<br>[-.13 to .03]  | No difference                                                               |
| 50 | Team Sport: Non-Participants (ref) vs. Discontinuers from age 12-20   | Depressive Symptoms age 20           | Odds Ratio (OR), 95%CI               | n/a       | .73<br>[-.66 to 3.53]  | No effect                                                                   |
|    | Team Sport: Non-Participants (ref) vs. Sustainers from age 12-20      | Depressive Symptoms age 20           | Odds Ratio (OR), 95%CI               | n/a       | .41<br>[-1.30 to 2.13] | No effect                                                                   |

343 **Table 6**  
 344 *Effects sizes in moderate- and high-quality anxiety studies*

| ID | Predictor                                                         | Outcome                                                    | Measure of Effect                    | Results (unadjusted)    | Results (adjusted)     | Comments                                                                                 |
|----|-------------------------------------------------------------------|------------------------------------------------------------|--------------------------------------|-------------------------|------------------------|------------------------------------------------------------------------------------------|
| 87 | Weekly PA without coach: Never (ref) vs. 1-3 times age 10 (boys)  | (Time until) diagnosis of internalizing disorder or age 18 | Hazard Ratio (HR), 95%CI             | n/a                     | .78<br>[.54 to 1.14]   | No difference                                                                            |
|    | Weekly PA without coach: Never (ref) vs. 4+ times age 10 (boys)   | (Time until) diagnosis of internalizing disorder or age 18 | Hazard Ratio (HR), 95%CI             | n/a                     | .98<br>[.69 to 1.38]   | No difference                                                                            |
|    | Weekly PA with coach: Never (ref) vs. 1-3 times age 10 (boys)     | (Time until) diagnosis of internalizing disorder or age 18 | Hazard Ratio (HR), 95%CI             | n/a                     | .85<br>[.68 to 1.08]   | No difference                                                                            |
|    | Weekly PA with coach: Never (ref) vs. 4+ times age 10 (boys)      | (Time until) diagnosis of internalizing disorder or age 18 | Hazard Ratio (HR), 95%CI             | n/a                     | .73<br>[.55 to .98]    | 27% lower hazard of receiving a diagnosis of an internalizing disorder                   |
|    | Weekly PA without coach: Never (ref) vs. 1-3 times age 10 (girls) | (Time until) diagnosis of internalizing disorder or age 18 | Hazard Ratio (HR), 95%CI             | n/a                     | .80<br>[.61 to 1.06]   | No difference                                                                            |
|    | Weekly PA without coach: Never (ref) vs. 4+ times age 10 (girls)  | (Time until) diagnosis of internalizing disorder or age 18 | Hazard Ratio (HR), 95%CI             | n/a                     | .77<br>[.59 to 1.02]   | No difference                                                                            |
|    | Weekly PA with coach: Never (ref) vs. 1-3 times age 10 (girls)    | (Time until) diagnosis of internalizing disorder or age 18 | Hazard Ratio (HR), 95%CI             | n/a                     | 1.03<br>[.86 to 1.23]  | No difference                                                                            |
|    | Weekly PA with coach: Never (ref) vs. 4+ times age 10 (girls)     | (Time until) diagnosis of internalizing disorder or age 18 | Hazard Ratio (HR), 95%CI             | n/a                     | .92<br>[.71 to 1.18]   | No difference                                                                            |
| 8  | PA volume: per 100 count increase in mean cpm age 13              | Emotional Symptoms age 16                                  | Standardized Beta ( $\beta$ ), 95%CI | -.12<br>[-.24 to -.01]  | -.11<br>[-.23 to -.00] | 100count increase in mean daily cpm associated with small decrease in emotional symptoms |
|    | PA intensity: per 60min increase in daily MVPA age 13             | Emotional Symptoms age 16                                  | Standardized Beta ( $\beta$ ), 95%CI | -.54<br>[-1.08 to -.01] | -.49<br>[-1.02 to .04] | No effect in fully adjusted model                                                        |

|    |                                                              |                           |                                      |     |                           |                                                                                           |
|----|--------------------------------------------------------------|---------------------------|--------------------------------------|-----|---------------------------|-------------------------------------------------------------------------------------------|
| 3  | Per 30min increase in daily light PA (boys) age 7            | Emotional Symptoms age 11 | Standardized Beta ( $\beta$ ), 95%CI | n/a | -.039<br>[-.106 to .028]  | No effect                                                                                 |
|    | Per 30min increase in daily light PA (girls) age 7           | Emotional Symptoms age 11 | Standardized Beta ( $\beta$ ), 95%CI | n/a | -.026<br>[-.094 to .041]  | No effect                                                                                 |
|    | Per 15min increase in daily MVPA (boys) age 7                | Emotional Symptoms age 11 | Standardized Beta ( $\beta$ ), 95%CI | n/a | -.048<br>[-.111 to .015]  | No effect                                                                                 |
|    | Per 15min increase in daily MVPA (girls) age 7               | Emotional Symptoms age 11 | Standardized Beta ( $\beta$ ), 95%CI | n/a | -.049<br>[-.115 to .016]  | No effect                                                                                 |
| 91 | Team Sport: Replacing 60mins of television at age 14         | Emotional symptoms age 17 | Standardized Beta ( $\beta$ ), 95%CI | n/a | -.166<br>[-.300 to -.033] | Small reduction in emotional symptoms by replacing 60mins of TV with team sport           |
|    | Team Sport: Replacing 60mins of video games at age 14        | Emotional symptoms age 17 | Standardized Beta ( $\beta$ ), 95%CI | n/a | -.040<br>[-.178 to .098]  | No effect                                                                                 |
|    | Team Sport: Replacing 60mins of social media at age 14       | Emotional symptoms age 17 | Standardized Beta ( $\beta$ ), 95%CI | n/a | -.145<br>[-.282 to -.008] | Small reduction in emotional symptoms by replacing 60mins of social media with team sport |
|    | Team Sport: Replacing 60mins of computer at age 14           | Emotional symptoms age 17 | Standardized Beta ( $\beta$ ), 95%CI | n/a | -.069<br>[-.215 to .077]  | No effect                                                                                 |
|    | Individual Sport: Replacing 60mins of television at age 14   | Emotional symptoms age 17 | Standardized Beta ( $\beta$ ), 95%CI | n/a | -.041<br>[-.092 to .009]  | No effect                                                                                 |
|    | Individual Sport: Replacing 60mins of video games at age 14  | Emotional symptoms age 17 | Standardized Beta ( $\beta$ ), 95%CI | n/a | .016<br>[-.020 to .051]   | No effect                                                                                 |
|    | Individual Sport: Replacing 60mins of social media at age 14 | Emotional symptoms age 17 | Standardized Beta ( $\beta$ ), 95%CI | n/a | -.019<br>[-.049 to .011]  | No effect                                                                                 |
|    | Individual Sport: Replacing 60mins of computer at age 14     | Emotional symptoms age 17 | Standardized Beta ( $\beta$ ), 95%CI | n/a | .009<br>[-.028 to .047]   | No effect                                                                                 |
| 99 | All Sport: Low (ref) vs. High trajectory age 6-10            | Anxiety symptoms age 10   | Standardized Beta ( $\beta$ ), 95%CI | n/a | -.04<br>[-.12 to .05]     | No difference                                                                             |

|    |                                                                       |                                               |                                      |     |                        |                                                                               |
|----|-----------------------------------------------------------------------|-----------------------------------------------|--------------------------------------|-----|------------------------|-------------------------------------------------------------------------------|
|    | High participation in Team (ref) vs. Individual sport age 6-10        | Anxiety symptoms age 10                       | Standardized Beta ( $\beta$ ), 95%CI | n/a | .05<br>[-.05 to .15]   | No difference                                                                 |
|    | Team Sport: Low (ref) vs High trajectory from age 6-10                | Anxiety symptoms age 10                       | Standardized Beta ( $\beta$ ), 95%CI | n/a | -.09<br>[-.18 to -.01] | High involvement in team sports had small negative effect on anxiety symptoms |
|    | Individual Sport: Low (ref) vs. High trajectory from age 6-10         | Anxiety symptoms age 10                       | Standardized Beta ( $\beta$ ), 95%CI | n/a | -.03<br>[-.11 to .05]  | No difference                                                                 |
| 50 | Team Sport: Non-Participators (ref) vs. Discontinuers from ages 12-20 | Anxiety symptoms age 20 (panic disorder)      | Odds Ratio (OR), 95%CI               | n/a | .80<br>[.54 to 1.19]   | No difference                                                                 |
|    | Team Sport: Non-Participators (ref) vs. Discontinuers from ages 12-20 | Anxiety symptoms age 20 (generalized anxiety) | Odds Ratio (OR), 95%CI               | n/a | .78<br>[.52 to 1.17]   | No difference                                                                 |
|    | Team Sport: Non-Participators (ref) vs. Discontinuers from ages 12-20 | Anxiety symptoms age 20 (social anxiety)      | Odds Ratio (OR), 95%CI               | n/a | .90<br>[.61 to 1.31]   | No difference                                                                 |
|    | Team Sport: Non-Participators (ref) vs. Discontinuers from ages 12-20 | Anxiety symptoms age 20 (agoraphobia)         | Odds Ratio (OR), 95%CI               | n/a | .63<br>[.40 to .98]    | Discontinuers had 37% lesser odds of experiencing symptoms of agoraphobia     |
|    | Team Sport: Non-Participators (ref) vs. Sustainers from ages 12-20    | Anxiety symptoms age 20 (panic disorder)      | Odds Ratio (OR), 95%CI               | n/a | .57<br>[.34 to .94]    | Sustainers had 43% lesser odds of experiencing panic disorder symptoms        |
|    | Team Sport: Non-Participators (ref) vs. Sustainers from ages 12-20    | Anxiety symptoms age 20 (generalized anxiety) | Odds Ratio (OR), 95%CI               | n/a | .65<br>[.39 to 1.08]   | No difference                                                                 |
|    | Team Sport: Non-Participators (ref) vs. Sustainers from ages 12-20    | Anxiety symptoms age 20 (social anxiety)      | Odds Ratio (OR), 95%CI               | n/a | 1.05<br>[.66 to 1.67]  | No difference                                                                 |
|    | Team Sport: Non-Participators (ref) vs. Sustainers from ages 12-20    | Anxiety symptoms age 20 (agoraphobia)         | Odds Ratio (OR), 95%CI               | n/a | .77<br>[.43 to 1.36]   | No difference                                                                 |

346 **Table 7**  
 347 *Effects sizes in moderate- and high-quality wellbeing studies*

| ID | Predictor                                                                                          | Outcome                               | Measure of Effect                       | Results (unadjusted)    | Results (adjusted)            | Comments                                                                                                         |
|----|----------------------------------------------------------------------------------------------------|---------------------------------------|-----------------------------------------|-------------------------|-------------------------------|------------------------------------------------------------------------------------------------------------------|
| 54 | Consistently Not Meeting (ref) vs. Meeting WHO PA recommendations one year in 14 to 18-year-olds   | Social Health after two years (16-20) | Unstandardized Beta (B), (SE), <i>p</i> | n/a                     | 5.8 (1.3)<br><i>p</i> < .0001 | Meeting guidelines at one timepoint associated with "clinically meaningful" improvement in social health         |
|    | Consistently Not Meeting (ref) vs. Meeting WHO PA recommendations both years in 14 to 18-year-olds | Social Health after two years (16-20) | Unstandardized Beta (B), (SE), <i>p</i> | n/a                     | 9.3 (1.2)<br><i>p</i> < .0001 | Consistently meeting guidelines associated with a moderate, "clinically meaningful" improvement in social health |
| 8  | PA volume: per 100 count increase in mean counts per minute age 13                                 | Wellbeing age 16                      | Standardized Beta (β), 95%CI            | -.06<br>[-.47 to .35]   | -.02<br>[-.44 to .40]         | No effect in fully adjusted model                                                                                |
|    | PA intensity: per 60min increase in daily MVPA age 13                                              | Wellbeing age 16                      | Standardized Beta (β), 95%CI            | -.54<br>[-2.49 to 1.41] | .03<br>[-1.98 to 2.05]        | No effect in fully adjusted model                                                                                |
|    | PA volume: per 100 count increase in mean counts per minute age 13                                 | Peer Relations age 16                 | Standardized Beta (β), 95%CI            | -.02<br>[-.09 to .06]   | -.02<br>[-.09 to .05]         | No effect                                                                                                        |
|    | PA intensity: per 60min increase in daily MVPA age 13                                              | Peer Relations age 16                 | Standardized Beta (β), 95%CI            | -.15<br>[-.49 to .20]   | -.16<br>[-.51 to .19]         | No effect                                                                                                        |
| 61 | Times engaging in PA in past week in 12 to 17-year-olds (males)                                    | Self-Esteem after one year (13-18)    | Unstandardized Beta (B), SE, <i>p</i>   | n/a                     | .063 (.014)<br><i>p</i> < .01 | Each additional bout of weekly PA had a small positive effect for self-esteem one year later                     |
|    | Times engaging in PA in past week in 12 to 17-year-olds (females)                                  | Self-Esteem after one year (13-18)    | Unstandardized Beta (B), SE, <i>p</i>   | n/a                     | .062 (.015)<br><i>p</i> < .01 | Each additional bout of weekly PA had a small positive effect for self-esteem one year later                     |
| 3  | Per 30min increase in daily light PA (boys) age 7                                                  | Peer Relations age 11                 | Standardized Beta (β), 95%CI            | n/a                     | -.086<br>[-.150 to -.021]     | Small reduction in peer relationship problems                                                                    |
|    | Per 30min increase in daily light PA (girls) age 7                                                 | Peer Relations age 11                 | Standardized Beta (β), 95%CI            | n/a                     | -.071<br>[-.130 to -.013]     | Small reduction in peer relationship problems                                                                    |
|    | Per 15min increase in daily MVPA (boys) age 7                                                      | Peer Relations age 11                 | Standardized Beta (β), 95%CI            | n/a                     | -.077<br>[-.133 to -.022]     | Small reduction in peer relationship problems                                                                    |
|    | Per 15min increase in daily MVPA (girls) age 7                                                     | Peer Relations age 11                 | Standardized Beta (β), 95%CI            | n/a                     | -.007<br>[-.057 to .071]      | No effect                                                                                                        |

349 Fig 3 clusters studies by mental health outcome reported, length of follow-up (i.e., from first  
350 PA measurement to last mental health measurement) and whether they reported a statistically  
351 significant beneficial effect. Across nearly all timeframes and all outcomes, a greater proportion of  
352 studies reported a beneficial effect than did not, providing partial evidence that child/adolescent PA  
353 may predict anxiety, depression and wellbeing at least 12 months later and as far as 55 years across  
354 the lifespan<sup>(90)</sup>.

355 \*\*\* **Figure 3:** Length of studies in years grouped by outcome \*\*\*

356 A total of 41/67 depression studies (61.2%) reported significant negative associations (Table  
357 2). Ten of these studies were moderate- or high-quality<sup>(39, 41, 50, 53, 61, 63, 87, 90, 96, 99)</sup> and observed 1/42  
358 moderate, 17/42 small, and 24/42 non-significant effects (Table 5). In comparison, 19/35 studies  
359 (54.3%) reported significant negative associations with anxiety (Table 3). Of these, 6 were moderate-  
360 or high-quality<sup>(3, 8, 50, 87, 91, 99)</sup> and reported 1/34 moderate, 6/34 small and 27/34 non-significant effects  
361 (Table 6). Finally, 25/39 studies (64.1%) investigating indicators of wellbeing reported significant  
362 positive associations (Table 4). Of these, 4 were moderate- or high-quality<sup>(3, 8, 54, 61)</sup> and presented  
363 evidence of 2/12 moderate, 5/12 small and 5/12 non-significant effects (Table 7). A key is provided  
364 next to the study ID in Table 4 to indicate which indicator of wellbeing/flourishing was investigated.  
365 Further details on the 88 associations explored in moderate- or high-quality studies ( $n = 14$ ) can be  
366 found in Tables 5, 6, 7.

### 367 **Individual vs. group-based activities**

368 With just one exception<sup>(53)</sup>, all studies researching the effects of group-based or individual  
369 activities investigated sport participation. Team sports were found to be beneficial in 7/13 depression  
370 studies (53.8%), 8/9 anxiety studies (88.9%) and 1/2 wellbeing studies (50%). Individual sports were  
371 beneficial in 1/8 depression studies (12.5%), 4/6 anxiety studies (66.7%) and 0/1 wellbeing studies  
372 (0%). Effect sizes were consistently reported as small on all but two occasions<sup>(25, 50)</sup> wherein,  
373 compared to no participation, involvement in team sport throughout adolescence<sup>(25)</sup> with sustained



374 participation in early adulthood<sup>(50)</sup> was associated with 24% lower odds of depressive disorder  
375 diagnosis<sup>(25)</sup>, 30% lower odds of anxiety disorder diagnosis<sup>(25)</sup>, and 43% lower odds of panic disorder  
376 symptoms<sup>(50)</sup> in early adulthood. Moderate/high-quality studies reported that team but not individual  
377 sport participation in childhood/adolescence had small protective effects against prospective  
378 depressive and anxiety symptoms up to 3 years later<sup>(50, 63, 91, 99)</sup>. For further information on study  
379 lengths see Fig 4. For further information on all studies targeting either individual or group-based  
380 activities see Supporting Table S3.

381 \*\*\* **Figure 4:** Length of studies in years grouped by type of activity \*\*\*

### 382 **Domains of activity**

383 No studies focused on the effects of travel or household activities. In total, leisure-time  
384 activities were found to be beneficial in 7/12 depression studies (58.3%), 3/6 anxiety studies (50%)  
385 and 5/7 wellbeing studies (71.4%). School-based activities were beneficial in 5/8 depression studies  
386 (62.5%), 2/5 anxiety studies (40%) and 2/5 wellbeing studies (40%). Three studies reported moderate  
387 effects for depression, anxiety and wellbeing when leisure activity participation was high in  
388 adolescence and maintained into adulthood<sup>(47, 50, 58)</sup>. Specifically, 65% reduced relative risk of  
389 depression<sup>(47)</sup>, 47% reduced odds of panic disorder symptoms<sup>(50)</sup>, and twice the likelihood high life  
390 satisfaction<sup>(58)</sup> in early adulthood. Moderate and high-quality studies presented evidence that small  
391 beneficial effects of school sports (but not PE)<sup>(53)</sup> and leisure activities for anxiety and depressive  
392 symptoms were still observable after 3 years<sup>(50)</sup> and up to 55 years<sup>(90)</sup> in the future. For further  
393 information on study lengths see Fig 5. For further information on the effects of PA performed in  
394 leisure- or school-time see Supporting Table S4.

395 \*\*\* **Figure 5:** Length of studies in years grouped by domain of activity \*\*\*

## 396 **WHO MVPA guideline adherence**

397 In total, 12 studies used data referring to the mean daily amount of MVPA performed across  
398 the past 7 days (hence facilitating categorisation) or directly compared the effects of guideline  
399 adherence versus non-adherence. Positive effects of guideline adherence were reported in 2/4  
400 depression studies (50%), 1/3 anxiety studies (33.3%) and 4/5 wellbeing studies (80%). Findings  
401 were mixed across studies comparing adherence and non-adherence with 1/3 (33.3%) finding  
402 additional benefits of achieving meeting guidelines for future depressive symptoms, 0/2 (0%) for  
403 anxiety symptoms and 2/2 (100%) for wellbeing-related outcomes. All significant effect sizes  
404 reported were small. One study was high quality<sup>(54)</sup>, presenting evidence of a dose response  
405 relationship between years of WHO MVPA guideline adherence in adolescence and social quality of  
406 life measured one year later. For further information on study lengths see Fig 6. For further evidence  
407 of the prospective effects of WHO MVPA guideline (non)adherence, see Supporting Table S5.

408 \*\*\***Figure 6:** Length of studies in years grouped by WHO MVPA guideline adherence \*\*\*

## 409 **Discussion**

410 The present study was the first comprehensive systematic review to assess the association  
411 between PA performed in childhood/adolescence for future anxiety, depression and wellbeing using  
412 a longitudinal one-year time interval. Evidence of associations with anxiety, depression and wellbeing  
413 was deemed to be low quality due to heavy reliance on observational study designs. Moderate and  
414 high-quality studies reported small or non-significant effects of child/adolescent PA persisted for at  
415 least 12 months suggesting there may be some minor long term mental health benefits that emerge  
416 from participation in certain activities in youth. Directing PA promotion towards youth as a method  
417 of reducing long-term risk of mental illness or suboptimal wellbeing likely requires careful  
418 consideration of important contextual factors in order to be successful. For example, the longest  
419 running study in the review was high quality and investigated associations in 18,555 participants over

420 55 years<sup>(90)</sup>. PA performed age 16 but not age 7 or 11 had protective effects against depressive  
421 symptoms that grew in magnitude as participants progressed through mid-life and into old age. This  
422 study supports existing literature suggesting that the relationship between PA and prospective mental  
423 health outcomes may not be uniformly linear [23]. Inherent complexity in the relationship may be  
424 somewhat explained through consideration of type, domain and volume of the activity in question.

### 425 **Individual vs. group-based activities**

426 Psychosocial influences can play a key role in the relationship between PA and mental health.  
427 In PA research and in particular sports studies, psychosocial factors are commonly investigated by  
428 drawing comparisons between individual and group-based activities. Currently, the general  
429 hypothesis is that group-based or team-sport environments are more conducive to the development  
430 of interpersonal connections and social support networks than individual ones [36],[37]. The current  
431 review supports this stance with evidence that team sports are more consistently beneficial for long-  
432 term mental health outcomes than individual sports [60]. It is possible that group-based environments  
433 offer more opportunities for positive interpersonal interactions than individual environments, thus  
434 fulfilling an individual's need for relatedness and by extension, social wellbeing [61]. In addition, the  
435 readily available and naturally forming social support networks, social identification, and sense of  
436 belonging that can emerge through team membership may play a role in the reduction of depressive  
437 and anxiety symptoms [62].

438 Included studies investigated a number of psychosociological factors that influence the  
439 association between sport participation and mental health. Two studies controlled for mediating  
440 effects of sport self-concept and perceived sporting competence<sup>(70, 83)</sup> reporting that links with future  
441 self-esteem were fully dependent on positive sport-related self-beliefs which aligns with existing  
442 literature [62]. These studies, among others, present important points for PA promotion. Long-term  
443 mental health benefits of sport may not be felt equally for all individuals [60]. For many, PA, whether  
444 accumulated through physical education, school sport, or otherwise, can be perceived as a chore and

445 even unpleasant [63],[64] in which case, positive mental health outcomes are likely to be limited.  
446 Activities that can take place outside of competitive environments or those that do not lend themselves  
447 as easily to comparison with others may be more suitable for individuals with negative self-  
448 perceptions, at least in the first instance.

449 There are also some risks with sport involvement that were not addressed in the review such  
450 as the young person's goal-orientation or athletic identity. Goal Achievement Theory posits that ego-  
451 orientated goals can negatively impact wellbeing when playing poorly [65]. Likewise, strong athletic  
452 identities have been linked with anxiety during non-normative transitions [66]. It is important to be  
453 mindful of these potentially harmful aspects of participation throughout PA promotion and  
454 intervention design.

### 455 **Domains of activity**

456 Studies in the current review assessed only the effects of leisure or school-based activities  
457 leaving the prospective effects of active transport and household activities in young people to be  
458 determined. Whether there are differential effects associated with leisure or school-based activities in  
459 childhood/adolescence for prospective mental health outcomes remains unclear. One high-quality  
460 study<sup>(90)</sup> found no association between leisure activities performed age 7 or 11 while those performed  
461 at age 16 were associated with a 27% reduced risk of depressive symptoms between the ages of 23-  
462 62. This could infer the existence of a critical period during which being active yields greater long  
463 term mental health effects. Alternatively, such an outcome could be a product of the significant drop  
464 off in activity levels that typically coincides the transition from childhood to adolescence [67]. If  
465 activity levels reported age 7 or 11 did not track well over time they are less likely to predict future  
466 mental health [27].

467 Two moderate quality studies tested associations with school-based activities<sup>(39, 53)</sup>. One  
468 reported that participating in school sports in adolescence had a small negative association with  
469 depressive symptoms in early adulthood<sup>(39)</sup> whilst the other reported that specialist taught PE classes

470 at age 8 had no effect on depressive symptoms after 4 years and was even associated with less decline  
471 in symptoms compared to controls<sup>(53)</sup>. Again, inconsistent effects reported by these studies could be  
472 linked to poor tracking of PA levels across the transition from childhood to adolescence. They may  
473 also illuminate the importance of intrinsic motivation to participate which was more likely a  
474 contributing factor for those playing extracurricular sports than in compulsory PE classes [61].

475 Many explanatory mechanisms for domain-specific effects are rooted in self-determination  
476 theory [61]. Research in adults would suggest that household activities are seldom challenging  
477 enough to experience a sense of task-mastery, nor are they often fuelled by intrinsic motivation, and  
478 hence may not benefit mental health [38]. Indeed, in certain circumstances, these activities might  
479 even cause stress. In contrast, it is plausible that consistently connecting with the natural environment  
480 by walking to school with friends coupled with intrinsic motivation to be active could simultaneously  
481 satisfy one's need to connect with nature and each other [68],[69]. Ease of access to green space is  
482 cited alongside increased surveillance of life domains in the WHO's Global Action Plan for PA [20].  
483 For these reasons, more research on domain-specific PA, particularly active transport is required.

484 In adults, leisure and transport activities are more likely to be autonomy-supportive and  
485 provide opportunities to experience a sense of belonging than occupational or household activities  
486 [70]. Whilst adult-based literature can be used to inform hypotheses in children/adolescents,  
487 researchers should be careful not to generalise findings across these groups. Domain-specific effects  
488 on wellbeing can vary across age ranges with evidence that active transport is beneficial for adults  
489 but not adolescents [38]. Benefits may materialise for adults through autonomous endorsement of  
490 transport PA for enjoyment or health reasons compared to young people who may have to use active  
491 means of transport due to lack of an alternative [38]. Improving understanding of domains could help  
492 individuals working in public health develop more strategic interventions best suited to promote PA  
493 and mental health in different age groups and communities.

## 494 **WHO MVPA guideline adherence**

495 A moderate-quality study using the National Longitudinal Study of Adolescent Health (Add  
496 Health) data found that adherence vs. non-adherence to WHO MVPA guidelines in adolescence was  
497 associated with a 16% reduction in the incidence of depressive symptoms when aged 33 to 39<sup>(96)</sup>.  
498 Trajectory analysis from the same study found evidence of an added benefit for those who  
499 continuously met guidelines (i.e., throughout adolescence and adulthood) compared those who started  
500 to meet guidelines later in life. Whilst findings do not dispute the commonly held belief that it is  
501 never too late to start being active, they do infer that the younger we start, the better.

502 Guidelines dictate that across the week, children and adolescents should engage in an average  
503 of 60 minutes MVPA per day to experience health benefits. It is important to note that current MVPA  
504 guidelines are not specific to mental health and also aim to support physical health through  
505 cardiorespiratory fitness [39]. As such, focusing on the effects of 60 minutes of MVPA per day could  
506 mean that benefits associated with lesser amounts of PA are overlooked. Whilst in the current review  
507 beneficial effects emerged from guideline adherence, there were several incidences where benefits  
508 were achieved through lesser amounts<sup>(30, 51)</sup> or where there were no differences between those who  
509 met and did not meet guidelines<sup>(55, 85)</sup>. The current review presents partial evidence that WHO MVPA  
510 guideline adherence may be beneficial for long-term mental health. However, given the inconsistency  
511 of findings, perhaps a more realistic or achievable goal would be for young people to simply ‘get  
512 moving’. This approach aligns with a growing body of evidence that any activity is better than no  
513 activity [71],[72].

514 Research should continue to explore the benefits of WHO MVPA guideline adherence but  
515 broaden its focus to also consider the long-term effects of lesser volumes. Some low-quality studies  
516 reported that light-intensity PA performed in childhood/adolescence was associated with better social  
517 wellbeing<sup>(3)</sup> and fewer prospective depressive/anxiety symptoms<sup>(8, 41, 42)</sup>. Increasing light-intensity  
518 activity or introducing small bouts of MVPA through programmes such as ‘Snacktivity’ [73] aligns

519 with the small-change approach to habit-formation [74] and may present a more achievable goal for  
520 particularly inactive young people. Additionally, PA guidelines for children have only recently begun  
521 to incorporate muscle-strengthening activities (e.g., bodyweight exercises, resistance training) into  
522 recommendations. In our review, few studies measured such behaviours in young people<sup>(16, 26)</sup>. Given  
523 emerging research in adults showing the benefits of muscle strengthening activities for mental health  
524 beyond those associated with aerobic PA [75],[76], closer inspection of their association in  
525 children/adolescents' mental health is warranted.

## 526 **Heterogeneity & other observations**

527 Heterogeneity in the items used to measure mental health limited the comparability of study  
528 findings. For example, aside from two studies using the SMFQ to measure depression<sup>(29, 93)</sup>, every  
529 study investigating the effects of individual or group-based activities used a different measure of  
530 mental health. In total, 23 validated measures of depression, 19 validated measures of anxiety, and  
531 15 validated measures of wellbeing were used across the 98 studies alongside a plethora of non-  
532 validated items. Some scales have been validated for use in the general population however, to the  
533 best of our knowledge are yet to undergo formal validation in child/adolescent samples. In attempting  
534 to advance the field, psychometric validation studies should assess a range of metrics specifically  
535 designed for use in young people for concurrent/divergent validity, test-retest reliability, factor  
536 structure, and item comprehension. Such examples exist for health-related quality of life measures in  
537 children (e.g., KIDSCREEN-27)[77] but few have undergone the same rigorous assessments for  
538 mental illness.

539 Conversely, depression and anxiety are both unitary constructs with widely accepted  
540 definitions, so there is a greater likelihood that different scales converge on the same latent construct  
541 than for an ill-defined concept such as wellbeing. Two high quality studies with similar aged  
542 participants reported inconsistent effects between comparable levels of daily MVPA and social  
543 wellbeing<sup>(8, 54)</sup>. These studies are said to be measuring two broadly similar constructs in social quality

544 of life and peer relationships, but the lack of conceptual clarity makes it difficult to determine if they  
545 were comparing like for like. Concurrent validity studies have attempted to address this issue in the  
546 past [78] but up-to-date comparisons of wellbeing measures are scant. Rigorous validation studies for  
547 wellbeing measures in younger populations are necessary to improve study comparability going  
548 forward.

549 Historical shifts in research focus were observed. Studies using datasets commencing prior to  
550 the year 2000 displayed a clear tendency to investigate depression over anxiety and indicators of  
551 wellbeing. It could be argued that to reduce the subsequent disbalance in the literature, wellbeing  
552 and/or anxiety should be the focus of research going forward. However, technological advancements  
553 and ‘The Physical Activity Transition’ [79] toward more sedentary-type jobs/pastimes have given  
554 rise to a generational shift in PA patterns. This shift means the relationship between PA and mental  
555 health has evolved over time [63] making older data less representative of modern-day associations.  
556 PA participation now offers a way to reduce total screentime; an increasingly prevalent lifestyle factor  
557 independently linked to depression, anxiety, and self-esteem in young people that did not exist prior  
558 to the invention of smart phones [80]. Research must continue to investigate the extent to which PA  
559 can influence both mental illness and wellbeing to maintain up-to-date understanding of these  
560 perpetually fluid relationships.

### 561 **Limitations of included studies**

562 Due to heavy reliance on longitudinal cohort studies, most evidence was low quality. The  
563 resources required to monitor the effects of PA at one timepoint for mental health outcomes at least  
564 one year later are considerable, meaning the reliance on longitudinal cohort studies and other  
565 observational designs is likely to continue in the future. Whilst there is a need for more randomized  
566 trials, a more pertinent recommendation would be for those overseeing the management of  
567 longitudinal cohort studies to come to a consensus on a theoretically informed understanding of  
568 mental health and the measurement tools they use to improve physical activity and mental health



569 epistemology in young people. Such a move would reduce some limitations associated with  
570 secondary analysis and enhance study comparability whilst accommodating newly emerging high-  
571 level forms of statistical analyses such as retrospective data harmonization [81].

## 572 **Limitations of the review design**

573 Several studies used the same data-source to answer similar research questions, posing the  
574 risk that associations (or lack thereof) from a single data-source could skew findings [82]. A  
575 systematic process was followed [49] to compare studies using the same data-source on a number of  
576 study modifiers (see supporting files). Except for two studies<sup>(74, 86)</sup>, those included in data synthesis  
577 were all deemed to provide a unique insight into the association between child/adolescent PA and  
578 outcomes related to anxiety, depression or wellbeing at least 12 months later (Supporting Table S1).  
579 Further, best efforts have been made to ensure the source of observed associations is clear with SoF  
580 tables noting the dataset used in each article.

581 Aligning with Keyes' two-continua model meant that whilst the review was structured within  
582 a sound theoretical framework, a small number of studies had to be excluded as they analysed  
583 psychometric scales that combined aspects of mental illness and wellbeing into an overall mental  
584 health score. It is the authors' belief that the increased heterogeneity that would have arisen through  
585 inclusion of these additional measures would have obfuscated trends further and that the benefits of  
586 using Keyes' model as a conceptual framework outweighed its drawbacks, strengthening the quality  
587 of the review as a whole.

## 588 **Conclusions**

589 PA promotion in young people may represent a viable means of achieving a small reduction  
590 in the overall burden of CMDs and improving indicators of wellbeing in some individuals however,  
591 research is disjointed. The current review presents low quality partial evidence for PA participation  
592 in childhood/adolescence having small benefits for mental health outcomes related to anxiety,  
593 depression and wellbeing at least 12 months later. Team sport participation is among the most

594 consistently predictive type of PA. Long-term effects of domain-specific activities require further  
595 research with particular focus needed on the effects of active transport and household activities.  
596 Adhering to WHO MVPA guidelines in youth may be associated with small improvements in long-  
597 term mental health however, the benefits of lesser volumes and intensities of activity warrant further  
598 discussion. A vast range mental health measures used across studies led to heterogeneous operational  
599 definitions and conceptual ambiguity. Researchers must strive to achieve consensus on their  
600 theoretical approach and instruments used to measure depression, anxiety, and wellbeing in young  
601 people to overcome epistemological concerns and improve study comparability going forward.

## 602 **Acknowledgements**

603 We would like to thank all authors who provided additional information used for synthesis.

## 604 **References**

- 605 1. Schuch FB, Vancampfort D, Firth J, Rosenbaum S, Ward PB, Silva ES, et al. Physical activity  
606 and incident depression: a meta-analysis of prospective cohort studies. *Am J Psychiatry*.  
607 2018;175(7):631–48. doi: 10.1176/appi.ajp.2018.17111194
- 608 2. McDowell CP, Dishman RK, Gordon BR & Herring MP. Physical activity and anxiety: a  
609 systematic review and meta-analysis of prospective cohort studies. *Am J Prev Med*.  
610 2019;57(4):545–556. doi: 10.1016/j.amepre.2019.05.012
- 611 3. Wiese CW, Kuykendall, L & Tay L. Get active? A meta-analysis of leisure-time physical  
612 activity and subjective well-being. *J Posit Psychol*. 2018;13(1):57–66.  
613 doi: 10.1080/17439760.2017.1374436
- 614 4. Stubbs B, Vancampfort D, Hallgren M, Firth J, Veronese N, Solmi M et al. EPA guidance on  
615 physical activity as a treatment for severe mental illness: a meta-review of the evidence and  
616 Position Statement from the European Psychiatric Association (EPA), supported by the  
617 International Organization of Physical Therapists in Mental Health (IOPTMH). *Eur Psychiatry*.  
618 2018;54:124-144. doi: 10.1016/j.eurpsy.2018.07.004
- 619 5. 2018 Physical Activity Guidelines Advisory Committee Scientific Report. Available from:  
620 [https://health.gov/our-work/nutrition-physical-activity/physical-activity-guidelines/current-](https://health.gov/our-work/nutrition-physical-activity/physical-activity-guidelines/current-guidelines/scientific-report)  
621 [guidelines/scientific-report](https://health.gov/our-work/nutrition-physical-activity/physical-activity-guidelines/current-guidelines/scientific-report); 2018. Accessed: 19/06/2023
- 622 6. Brown WJ, Bauman AE, Bull F & Burton NW (2013). Development of Evidence-based  
623 Physical Activity Recommendations for Adults (18-64 years). Report prepared for the  
624 Australian Government Department of Health. 2012.
- 625 7. Okely AD, Ghersi D, Loughran SP, Cliff D, Shilton T & Jones R. (2019) Australian 24-hour  
626 movement guidelines for children (5-12 years) and young people (13-17 years): an integration  
627 of physical activity, sedentary behaviour, and sleep – research report: Australian Government,  
628 The Department of Health; 2019. Available from: <https://www.health.gov.au/topics/physical->

- 629 activity-and-exercise/physical-activity-and-exercise-guidelines-for-all-australians/for-children-  
630 and-young-people-5-to-17-years?language=und. Accessed: 19/06/2023
- 631 8. Keyes CL. Mental illness and/or mental health? Investigating axioms of the complete state  
632 model of health. *J Consult Clin Psychol.* 2005;73(3):539-548.
- 633 9. Westerhof GJ & Keyes CL. Mental illness and mental health: The two continua model across  
634 the lifespan. *J Adult Dev.* 2010;17(2):110-119. doi: 10.1007/s10804-009-9082-y
- 635 10. Keyes CL. The mental health continuum: From languishing to flourishing in life. *J Health Soc*  
636 *Behav.* 2002;43(2):207-222. doi: 10.2307/3090197
- 637 11. Keyes CL. Promoting and protecting mental health as flourishing: a complementary strategy for  
638 improving national mental health. *Am Psychol.* 2007;62(2):95-108.  
639 doi: 10.1037/0003-066X.62.2.95
- 640 12. Schotanus-Dijkstra M, Pieterse ME, Drossaert CH, Westerhof GJ, De Graaf R, ten Have M et  
641 al. What factors are associated with flourishing? Results from a large representative national  
642 sample. *J Happiness Stud.* 2016;17(4):1351-1370. doi: 10.1007/s10902-015-9647-3
- 643 13. Global Burden of Diseases Study. 2019. Available from: [https://ghdx.healthdata.org/gbd-](https://ghdx.healthdata.org/gbd-results-tool?params=gbd-api-2019-permalink/d780dffbe8a381b25e1416884959e88b)  
644 [results-tool?params=gbd-api-2019-permalink/d780dffbe8a381b25e1416884959e88b](https://ghdx.healthdata.org/gbd-results-tool?params=gbd-api-2019-permalink/d780dffbe8a381b25e1416884959e88b).  
645 Accessed: 19/06/2023
- 646 14. Steel Z, Marnane C, Iranpour C, Chey T, Jackson JW, Patel V et al. The global prevalence of  
647 common mental disorders: a systematic review and meta-analysis 1980–2013. *Int J Epidemiol.*  
648 2014;43(2):476-493. doi: 10.1093/ije/dyu038
- 649 15. Chisholm D, Sweeny K, Sheehan P, Rasmussen B, Smit F, Cuijpers P et al. Scaling-up  
650 treatment of depression and anxiety: a global return on investment analysis. *Lancet Psychiatry.*  
651 2016;3(5):415-424. doi: 10.1016/S2215-0366(16)30024-4
- 652 16. Katzmarzyk PT, Friedenreich C, Shiroma EJ & Lee IM. Physical inactivity and non-  
653 communicable disease burden in low-income, middle-income and high-income countries. *Br J*  
654 *Sports Med.* 2022;56(2):101–106. doi: 10.1136/bjsports-2020-103640

- 655 17. Simons G & Baldwin DS. A critical review of the definition of ‘wellbeing’ for doctors and their  
656 patients in a post Covid-19 era. *Int J Soc Psychiatry*. 2021;67(8):984-991.  
657 doi: 10.1177/00207640211032259
- 658 18. Huppert FA & So TT. Flourishing across Europe: Application of a new conceptual framework  
659 for defining wellbeing. *Soc Indic Res*. 2013;110(3):837-861. doi: 10.1007/s11205-011-9966-7
- 660 19. Diener E & Ryan K. Subjective well-being: A general overview. *S Afr J Psychol*.  
661 2009;39(4):391-406. doi: 10.1177/008124630903900402
- 662 20. World Health Organisation (WHO). Global Action Plan on Physical Activity 2018-2030: More  
663 Active People for a Healthier World. Geneva: WHO; 2019.
- 664 21. Guthold R, Stevens GA, Riley LM & Bull FC. Worldwide trends in insufficient physical  
665 activity from 2001 to 2016: a pooled analysis of 358 population-based surveys with 1.9 million  
666 participants. *Lancet Glob Health*. 2018;6(10):e1077–e1086. doi: 10.1016/S2214-  
667 109X(18)30357-7
- 668 22. Guthold R, Stevens GA, Riley LM & Bull FC. Global trends in insufficient physical activity  
669 among adolescents: a pooled analysis of 298 population-based surveys with 1.6 million  
670 participants. *Lancet Child Adolesc Health*. 2020;4(1):23–35. doi: 10.1016/S2352-  
671 4642(19)30323-2
- 672 23. Biddle SJ, Ciaccioni S, Thomas G & Vergeer I. Physical activity and mental health in children  
673 and adolescents: An updated review of reviews and an analysis of causality. *Psychol Sport*  
674 *Exerc*. 2019;42:146-155. doi: 10.1016/j.psychsport.2018.08.011
- 675 24. Dale LP, Vanderloo L, Moore S & Faulkner G. Physical activity and depression, anxiety, and  
676 self-esteem in children and youth: An umbrella systematic review. *Ment Health Phys Act*.  
677 2019;16:66–79. doi: 10.1016/j.mhpa.2018.12.001
- 678 25. Rodriguez-Ayllon M, Cadenas-Sánchez C, Estévez-López F, Muñoz NE, Mora-Gonzalez J,  
679 Migueles JH et al. Role of physical activity and sedentary behavior in the mental health of

- 680 preschoolers, children and adolescents: a systematic review and meta-analysis. *Sports Med.*  
681 2019;49(9):1383-1410. doi: 10.1007/s40279-019-01099-5
- 682 26. Kristensen PL, Møller N, Korsholm L, Wedderkopp N, Andersen LB & Froberg K. Tracking of  
683 objectively measured physical activity from childhood to adolescence: the European youth heart  
684 study. *Scand J Med Sci Sports.* 2008;18(2):171–178. doi: 10.1111/j.1600-0838.2006.00622.x
- 685 27. Telama R, Yang X, Leskinen E, Kankaanpää A, Hirvensalo M, Tammelin T et al. Tracking of  
686 physical activity from early childhood through youth into adulthood. *Med Sci Sports Exerc.*  
687 2014;46(5):955–962. doi: 10.1249/mss.0000000000000181
- 688 28. Connolly S, Carlin A, Johnston A, Woods C, Powell C, Belton S et al. Physical Activity, Sport  
689 and Physical Education in Northern Ireland School Children: A Cross-Sectional Study. *Int J*  
690 *Environ Res Public Health.* 2020;17(18):6849. doi: 10.3390/ijerph17186849
- 691 29. Lawrence D, Hafekost J, Johnson SE, Saw S, Buckingham WJ, Sawyer MG et al. Key findings  
692 from the second Australian child and adolescent survey of mental health and wellbeing. *Aust N*  
693 *Z J Psychiatry.* 2016;50(9):876-886. doi: 10.1177/0004867415617836
- 694 30. Inchley J, Currie D, Budisavljevic S, Torsheim T, Jåstad A, Cosma A et al. Spotlight on  
695 adolescent health and well-being: Findings from the 2017/2018 Health Behaviour in School-  
696 Aged Children (HBSC) survey in Europe and Canada. International Report. 2020. 1. Available  
697 from: <https://apps.who.int/iris/handle/10665/332104>. Accessed: 19/05/2023
- 698 31. Solmi M, Radua J, Olivola M, Croce E, Soardo L, Salazar de Pablo G. et al. Age at onset of  
699 mental disorders worldwide: large-scale meta-analysis of 192 epidemiological studies. *Mol*  
700 *Psychiatry.* 2022;27(1):281–295. doi: 10.1038/s41380-021-01161-7
- 701 32. Berk L. *Child development* (9<sup>th</sup> Edition). Pearson Higher Education AU; 2015
- 702 33. Donaldson C, Moore G & Hawkins J. A systematic review of school transition interventions to  
703 improve mental health and wellbeing outcomes in children and young people. *School Ment*  
704 *Health.* 2023;15:19-35. doi: 10.1007/s12310-022-09539-w

- 705 34. Page MJ, McKenzie JE, Bossuyt PM, Boutron I, Hoffmann TC, Mulrow CD et al. The PRISMA  
706 2020 statement: an updated guideline for reporting systematic reviews. *Int J Surg.*  
707 2021;88:105906. doi: 10.1016/j.ijisu.2021.105906
- 708 35. Caspersen CJ, Powell KE & Christenson GM. Physical activity, exercise, and physical fitness:  
709 definitions and distinctions for health-related research. *Public Health Rep.* 1985;100(2):126.  
710 PMID: 3920711
- 711 36. Eime RM, Young JA, Harvey JT, Charity MJ & Payne WR. A systematic review of the  
712 psychological and social benefits of participation in sport for children and adolescents:  
713 informing development of a conceptual model of health through sport. *Int J Behav Nutr Phys*  
714 *Act.* 2013;10(1):1-21. doi: 10.1186/1479-5868-10-98
- 715 37. Evans MB, Allan V, Erickson K, Martin LJ, Budziszewski R & Côté J. Are all sport activities  
716 equal? A systematic review of how youth psychosocial experiences vary across differing sport  
717 activities. *Br J Sports Med.* 2017;51(3):169-176. doi: 10.1136/bjsports-2016-097326
- 718 38. White RL, Babic MJ, Parker PD, Lubans DR, Astell-Burt T & Lonsdale C. Domain-specific  
719 physical activity and mental health: a meta-analysis. *Am J Prev Med.* 2017;52(5):653-666.  
720 doi: 10.1016/j.amepre.2016.12.008
- 721 39. Teychenne M, White RL, Richards J, Schuch FB, Rosenbaum S & Bennie JA. Do we need  
722 physical activity guidelines for mental health: What does the evidence tell us? *Ment Health Phys*  
723 *Act.* 2020;18:100315. doi: 10.1016/j.mhpa.2019.100315
- 724 40. Sawyer SM, Azzopardi PS, Wickremarathne D & Patton GC. The age of adolescence. *Lancet*  
725 *Child Adolesc Health.* 2018;2(3):223-228. doi: 10.1016/S2352-4642(18)30022-1
- 726 41. Ainsworth B, Cahalin L, Buman M & Ross R. The current state of physical activity assessment  
727 tools. *Prog Cardiovasc Dis.* 2015;57(4):387-395. doi: 10.1016/j.pcad.2014.10.005
- 728 42. Gunnell KE, Belcourt VJ, Tomasone JR & Weeks LC. Systematic review methods. *Int Rev*  
729 *Sport Exerc Psychol.* 2022;15(1):5-29. doi: 10.1080/1750984X.2021.1966823

- 730 43. Guyatt GH, Oxman AD, Vist GE, Kunz R, Falck-Ytter Y, Alonso-Coello P et al. GRADE: an  
731 emerging consensus on rating quality of evidence and strength of recommendations. *BMJ*.  
732 2008;336(7650):924-926. doi: 10.1136/bmj.39489.470347.AD
- 733 44. Campbell M, McKenzie JE, Sowden A, Katikireddi SV, Brennan SE, Ellis S et al. Synthesis  
734 without meta-analysis (SWiM) in systematic reviews: Reporting guideline. *BMJ*.  
735 2020;368:16890. doi: 10.1136/bmj.l6890
- 736 45. Henry S, Ospina MB, Dennett L & Hicks A. Assessing the Risk of Respiratory-Related  
737 Healthcare Visits Associated with Wildfire Smoke Exposure in Children 0–18 Years Old: A  
738 Systematic Review. *Int J Environ Res Public Health*. 2021;18(16):8799. doi:  
739 10.3390/ijerph18168799
- 740 46. Cohen J. The effect size. *Statistical Power Analysis for the Behavioral Sciences*. 1988;77-83.  
741 ISBN 0-8058-0283-5
- 742 47. Fey CF, Hu T & Delios A. The Measurement and communication of effect sizes in management  
743 research. *Manag Organ Rev*. 2023;19(1):176-197. doi: 10.1017/mor.2022.2
- 744 48. Breslin G, Shannon S, Haughey T, Donnelly P & Leavey G. A systematic review of  
745 interventions to increase awareness of mental health and well-being in athletes, coaches and  
746 officials. *Syst Rev*. 2017;6(1):1-15. doi: 10.1186/s13643-017-0568-6
- 747 49. Dishman RK, McDowell CP, Herring MP. Customary physical activity and odds of depression:  
748 a systematic review and meta-analysis of 111 prospective cohort studies. *Br J Sports Med*.  
749 2021;55(16):926–34. doi: 10.1136/bjsports-2020-103140
- 750 50. Radloff LS. The CES-D scale: A self-report depression scale for research in the general  
751 population. *Appl Psychol Meas*. 1977;1(3):385-401. doi: 10.1177/014662167700100306
- 752 51. Goodman R. The Strengths and Difficulties Questionnaire: a research note. *J Child Psychol*  
753 *Psychiatry*. 1997;38(5):581-586. doi: 10.1111/j.1469-7610.1997.tb01545.x



- 754 52. Diener E, Wirtz D, Tov W, Kim-Prieto C, Choi D, Oishi S, et al. New well-being measures:  
755 Short scales to assess flourishing and positive and negative feelings. *Soc Indic Res.*  
756 2010;97(2):143–56. doi: 10.1007/s11205-009-9493-y
- 757 53. Bullinger M. Entwicklung und anwendung von instrumenten zur erfassung der lebensqualität.  
758 *Lebensqualitätsforschung.* 1997;1-6.
- 759 54. Tennant R, Hiller L, Fishwick R, Platt S, Joseph S, Weich S, et al. The Warwick-Edinburgh  
760 mental well-being scale (WEMWBS): development and UK validation. *Health Qual Life*  
761 *Outcomes.* 2007;5(1):1–13. doi: 10.1186/1477-7525-5-63
- 762 55. Rosenberg M. Rosenberg self-esteem scale (RSE). *Acceptance and commitment therapy.*  
763 *Measures Package.* 1965;61(52):18.
- 764 56. Harter S. Self-perception profile for children. *Hisp J Behav Sci.* 1985. doi: 10.1037/t05338-000
- 765 57. Diener ED, Emmons RA, Larsen RJ & Griffin S. The satisfaction with life scale. *J Pers Assess.*  
766 1985;49(1):71-75. doi: 10.1207/s15327752jpa4901\_13
- 767 58. Huebner ES. Initial development of the student's life satisfaction scale. *School Psychol Int.*  
768 1991;12(3):231-240. doi: 10.1177/0143034391123010
- 769 59. Watson D, Clark LA & Tellegen A. Development and validation of brief measures of positive  
770 and negative affect: The PANAS scales. *J Pers Soc Psychol.* 1988;54(6):1063–1070.  
771 doi: 10.1037/0022-3514.54.6.1063
- 772 60. Lubans D, Richards J, Hillman C, Faulkner G, Beauchamp M, Nilsson M et al. Physical activity  
773 for cognitive and mental health in youth: a systematic review of mechanisms. *Pediatr.*  
774 2016;138(3):e20161642. doi: 10.1542/peds.2016-1642
- 775 61. Ryan RM & Deci EL. *Self-determination theory: basic psychological needs in motivation,*  
776 *development, and wellness.* New York: Guilford Press; 2017.
- 777 62. Vella SA, Benson A, Sutcliffe J, McLaren C, Swann C, Schweickle MJ et al. Self-determined  
778 motivation, social identification and the mental health of adolescent male team sport  
779 participants. *J Appl Sport Psychol.* 2021;33(4):452-466. doi: 10.1080/10413200.2019.1705432

- 780 63. Biddle SJ, Mutrie N & Gorely T. Psychology of Physical Activity: Determinants, Well-Being  
781 and Interventions. United States: Taylor & Francis; 2021. ISBN: 9781000367553
- 782 64. Ekkekakis P, Zenko Z & Vazou S. Do you find exercise pleasant or unpleasant? The Affective  
783 Exercise Experiences (AFFEXX) questionnaire. Psychol Sport Exerc. 2021;55:101930.  
784 doi: 10.1016/j.psychsport.2021.101930
- 785 65. Reinboth M & Duda JL. Effects of competitive environment and outcome on achievement  
786 behaviors and well-being while engaged in a physical task. Sport Exerc Perform Psychol.  
787 2016;5(4):324–336. doi: 10.1037/spy0000075
- 788 66. Knowles C, Shannon S, Prentice G & Breslin G. Comparing mental health of athletes and non-  
789 athletes as they emerge from a COVID-19 pandemic lockdown. Front Sports Act Living.  
790 2021;3:612532. doi: 10.3389/fspor.2021.612532
- 791 67. O'Donovan G, Blazeovich AJ, Boreham C, Cooper AR, Crank H, Ekelund U et al. The ABC of  
792 Physical Activity for Health: a consensus statement from the British Association of Sport and  
793 Exercise Sciences. J Sports Sci. 2010;28(6):573–591. doi: 10.1080/02640411003671212
- 794 68. Beyer KM, Kaltenbach A, Szabo A, Bogar S, Nieto FJ & Malecki KM. Exposure to  
795 neighborhood green space and mental health: evidence from the survey of the health of  
796 Wisconsin. Int J Environ Res Public Health. 2014;11(3): 3453-3472. doi:  
797 10.3390/ijerph110303453
- 798 69. Bikomeye JC, Balza J & Beyer KM. The impact of schoolyard greening on children's physical  
799 activity and socioemotional health: A systematic review of experimental studies. Int J Environ  
800 Res Public Health. 2021;18(2):535. doi: 10.3390/ijerph18020535
- 801 70. Teychenne M, Abbott G, Lamb KE, Rosenbaum S & Ball K. Is the link between movement and  
802 mental health a two-way street? Prospective associations between physical activity, sedentary  
803 behaviour and depressive symptoms among women living in socioeconomically disadvantaged  
804 neighbourhoods. Prev Med. 2017;102:72–78. doi: 10.1016/j.ypmed.2017.07.005

- 805 71. Bull FC, Al-Ansari SS, Biddle S, Borodulin K, Buman MP, Cardon G et al. World Health  
806 Organization 2020 guidelines on physical activity and sedentary behaviour. *Br J Sports Med.*  
807 2020;54(24):1451-1462. doi: 10.1136/bjsports-2020-102955
- 808 72. Department of Health and Social Care. *UK Chief Medical Officers' Physical Activity*  
809 *Guidelines*. London: Department of Health and Social Care, 2019. Available from:  
810 [https://www.gov.uk/government/publications/physical-activity-guidelines-uk-chief-medical-](https://www.gov.uk/government/publications/physical-activity-guidelines-uk-chief-medical-officers-report)  
811 [officers-report](https://www.gov.uk/government/publications/physical-activity-guidelines-uk-chief-medical-officers-report). Accessed: 19/06/2023
- 812 73. Sanders JP, Biddle SJ, Gokal K, Sherar LB, Skrybant M, Parretti HM et al. 'Snacktivity™' to  
813 increase physical activity: Time to try something different? *Prev Med.* 2021;153: 106851.  
814 doi: 10.1016/j.ypmed.2021.106851
- 815 74. Fogg BJ. *Tiny habits: The small changes that change everything*. London: Houghton Mifflin  
816 Harcourt; 2019. ISBN: 9780358003328
- 817 75. Bennie JA, Teychenne MJ, De Cocker K & Biddle SJ. Associations between aerobic and  
818 muscle-strengthening exercise with depressive symptom severity among 17,839 US adults. *Prev*  
819 *Med.* 2019;121:121-127. doi: 10.1016/j.ypmed.2019.02.022
- 820 76. Shannon S, Carlin A, Woods C, Nevill AM, Murphy N & Murphy MH. Adherence to aerobic  
821 and muscle-strengthening components of the physical activity guidelines and mental health.  
822 *Health Promot Int.* 2022;37(5):1-11. doi: 10.1093/heapro/daac083
- 823 77. Ravens-Sieberer U, Auquier P, Erhart M, Gosch A, Rajmil L, Bruil J et al. The KIDSCREEN-  
824 27 quality of life measure for children and adolescents: psychometric results from a cross-  
825 cultural survey in 13 European countries. *Qual Life Res.* 2007;16(8):1347-1356.  
826 doi: 10.1007/s11136-007-9240-2
- 827 78. Hagborg WJ. The Rosenberg Self-Esteem scale and Harter's Self-Perception profile for  
828 adolescents: a concurrent validity study. *Psychol Sch.* 1993;30(2):132-136.  
829 doi: 10.1002/1520-6807(199304)30:2<132::aid-pits2310300205>3.0.co;2-z

- 830 79. Katzmarzyk PT & Mason C. The physical activity transition. *J Phys Act Health*. 2009;6(3):269–  
831 280. doi: 10.1123/jpah.6.3.269
- 832 80. Stiglic N & Viner RM. Effects of screentime on the health and well-being of children and  
833 adolescents: a systematic review of reviews. *BMJ Open*. 2019;9(1):e023191.  
834 doi: 10.1136/bmjopen-2018-023191
- 835 81. Fortier I, Raina P, Van den Heuvel ER, Griffith LE, Craig C, Saliba M et al. Maelstrom  
836 Research guidelines for rigorous retrospective data harmonization. *Int J Epidemiol*.  
837 2017;46(1):103-105. doi: 10.1093/ije/dyw075
- 838 82. Wood JA. Methodology for dealing with duplicate study effects in a meta-analysis. *Organ Res*  
839 *Methods*. 2008;11(1):79-95. doi: 10.1177/1094428106296638

## 840 **Supporting information**

- 841 **S1 Table: References of all studies included in the review**
- 842 **S2 File: Study modifiers**
- 843 **S3 Table: Duplicated datasets**
- 844 **S4 Table: Study characteristics**
- 845 **S5 Table: Studies of individual and group-based physical activity**
- 846 **S6 Table: Studies of leisure-time and school-based physical activity**
- 847 **S7 Table: Studies investigating effects of WHO MVPA guideline adherence**
- 848 **S8 File: Abbreviations for datasets and measures used**
- 849 **S9 File: Database search terms**
- 850 **S10 File: Review protocol**

## Identification of studies via databases and registers

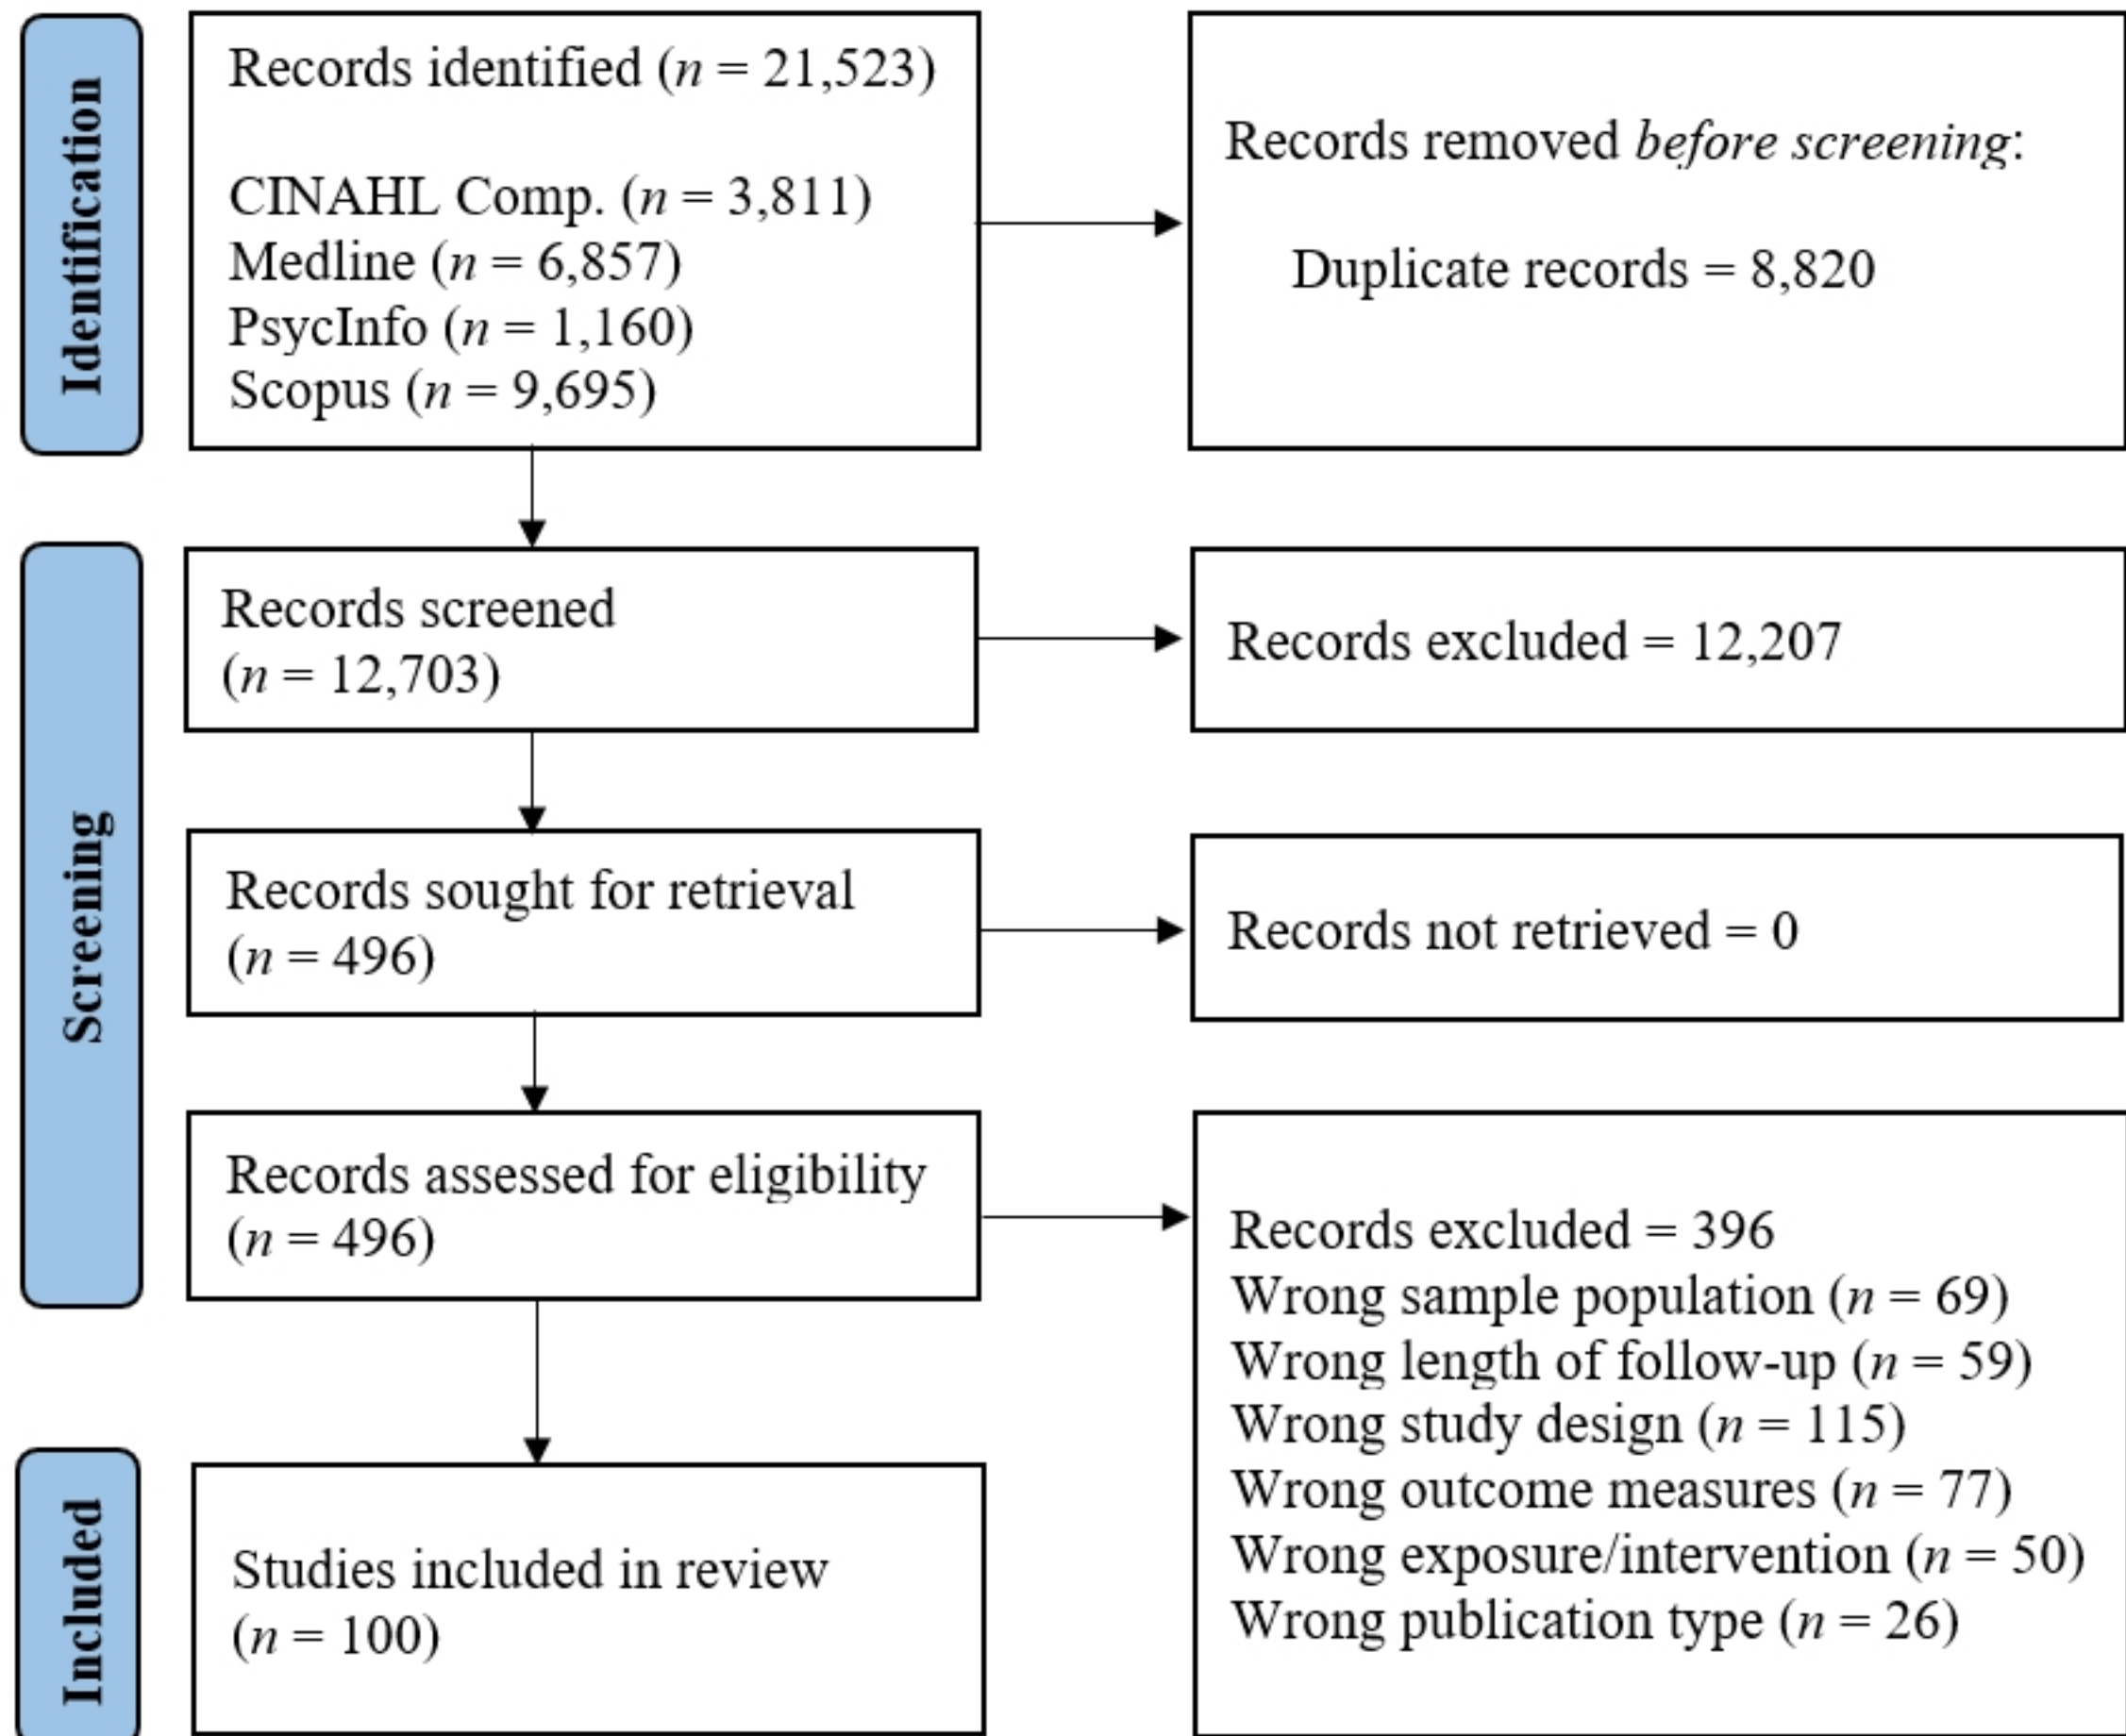

Fig 1

# Year of Publication

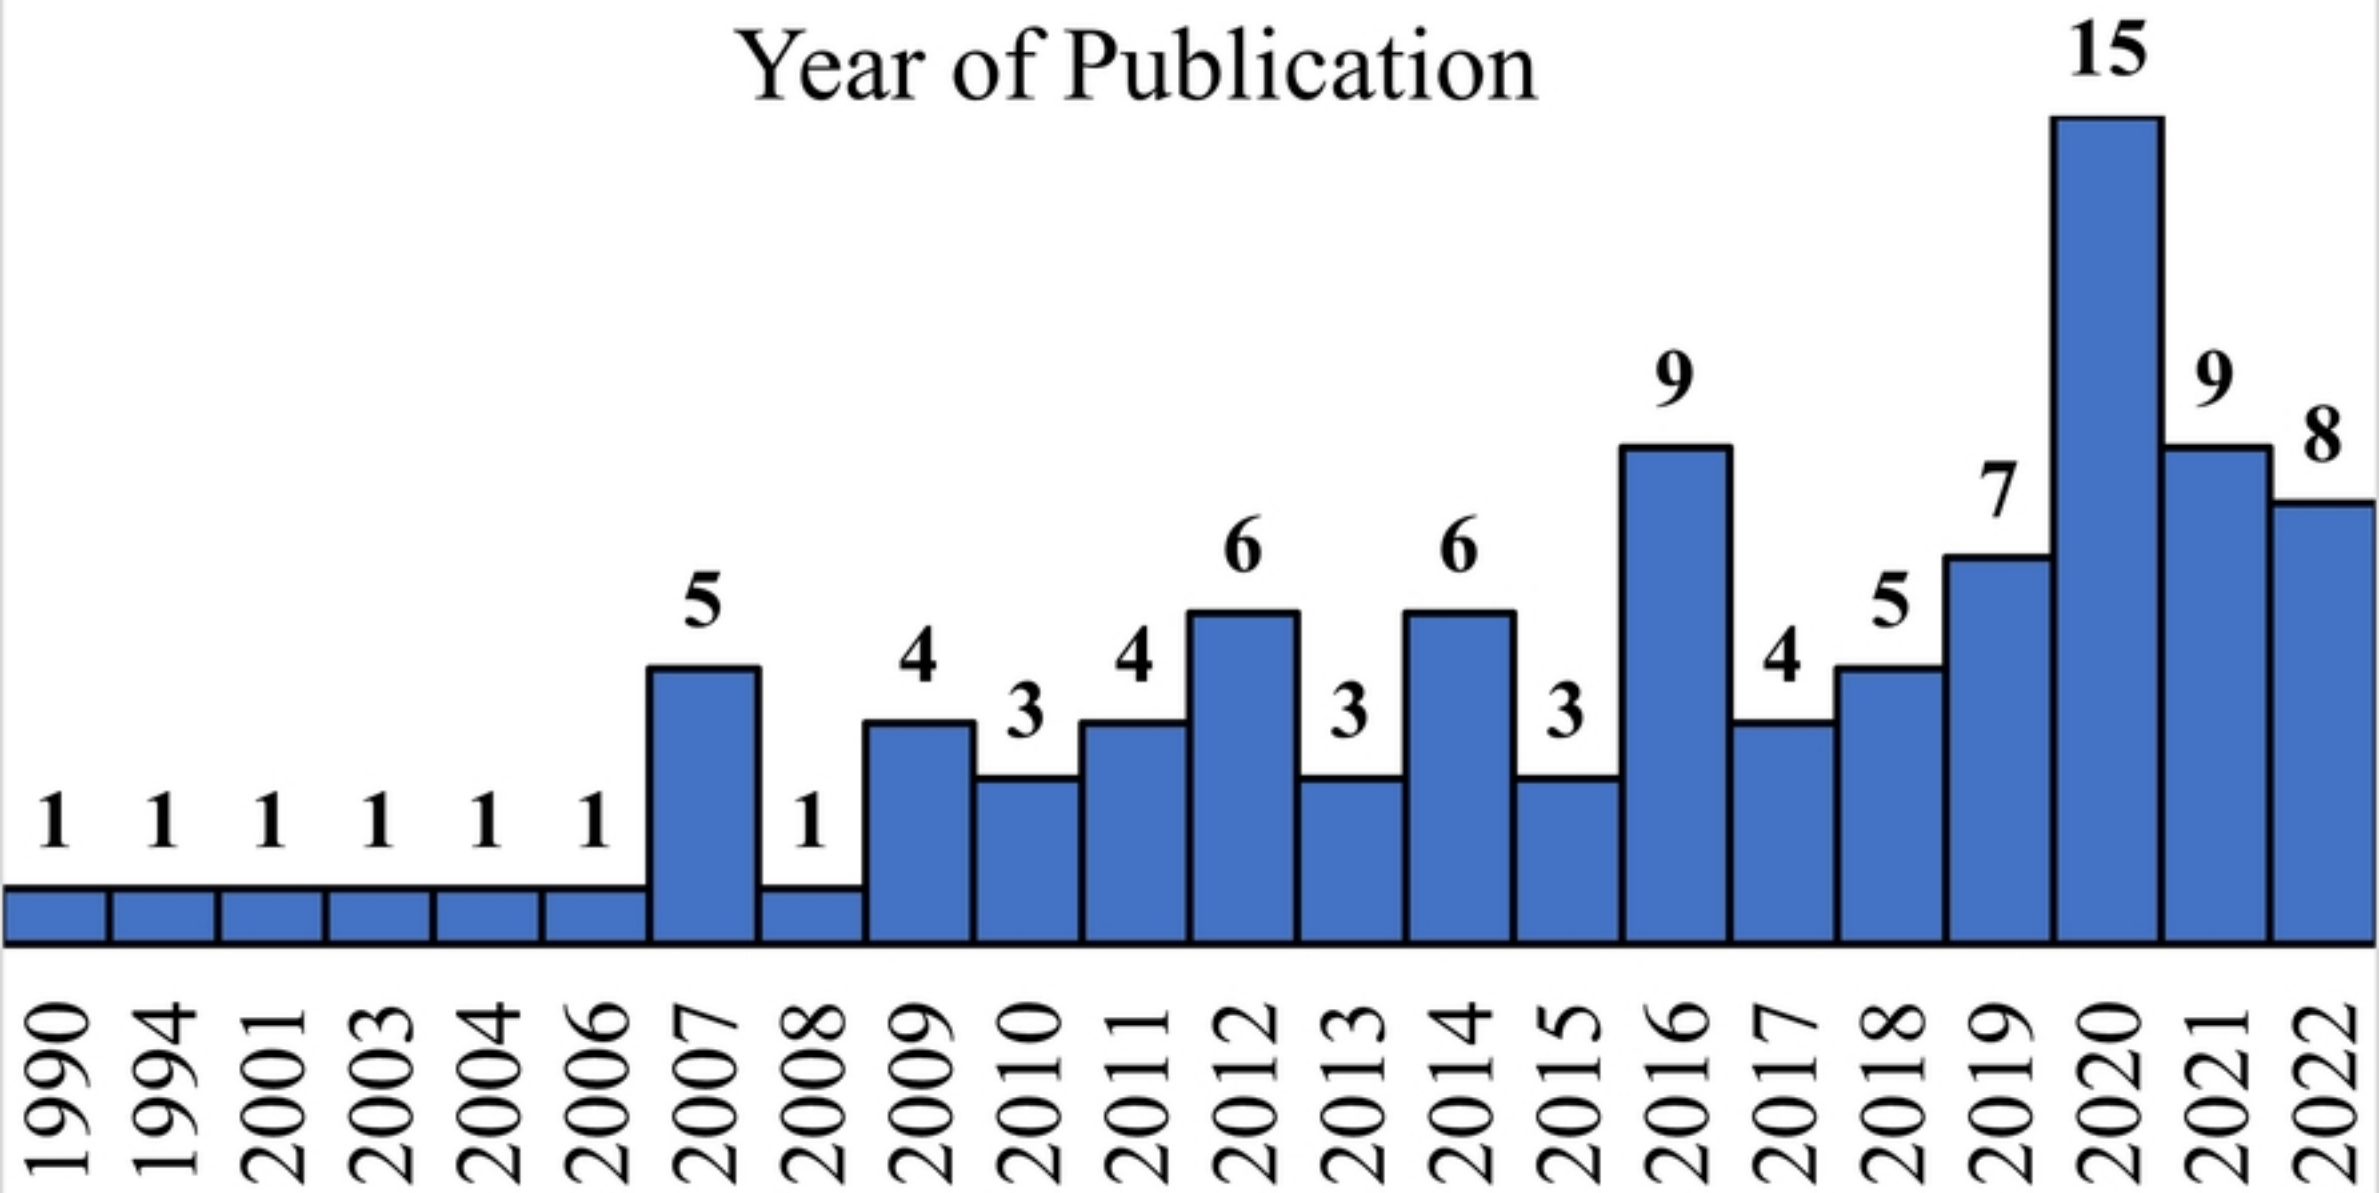

Fig2

## Length of Studies (Years)

■ Beneficial Effect  
■ No Effect

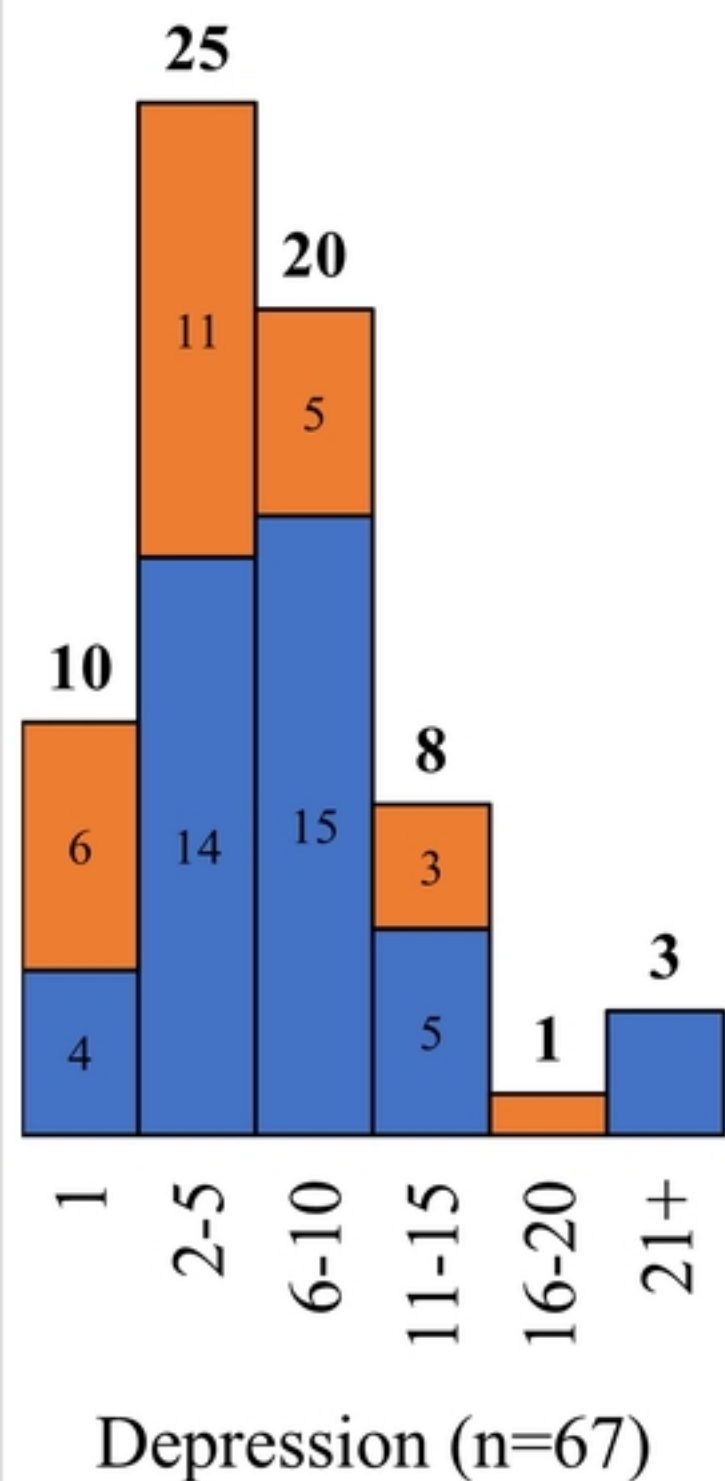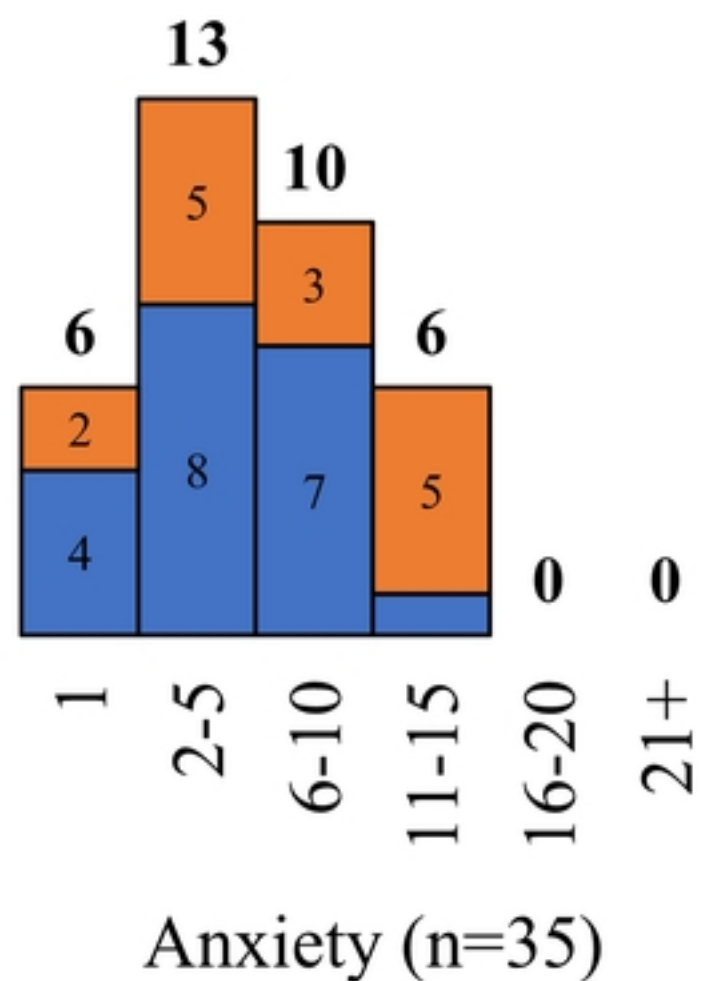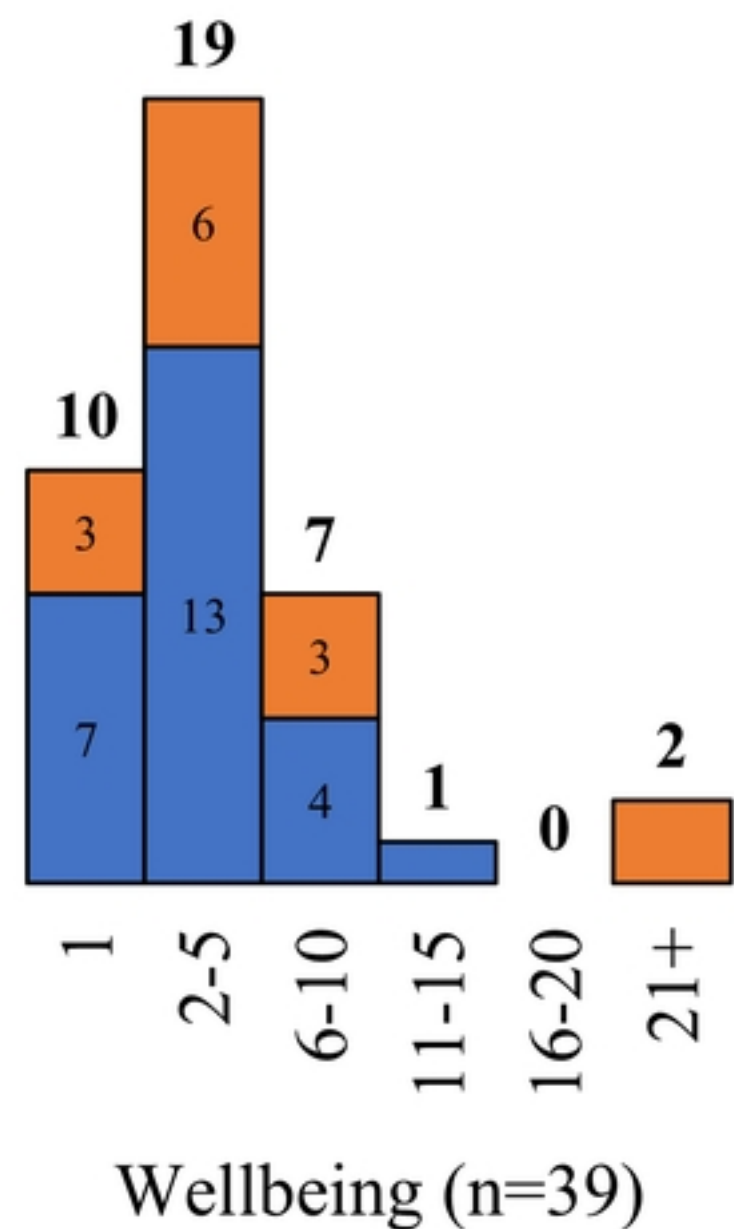

Fig3

# Length of Studies by Type (Years)

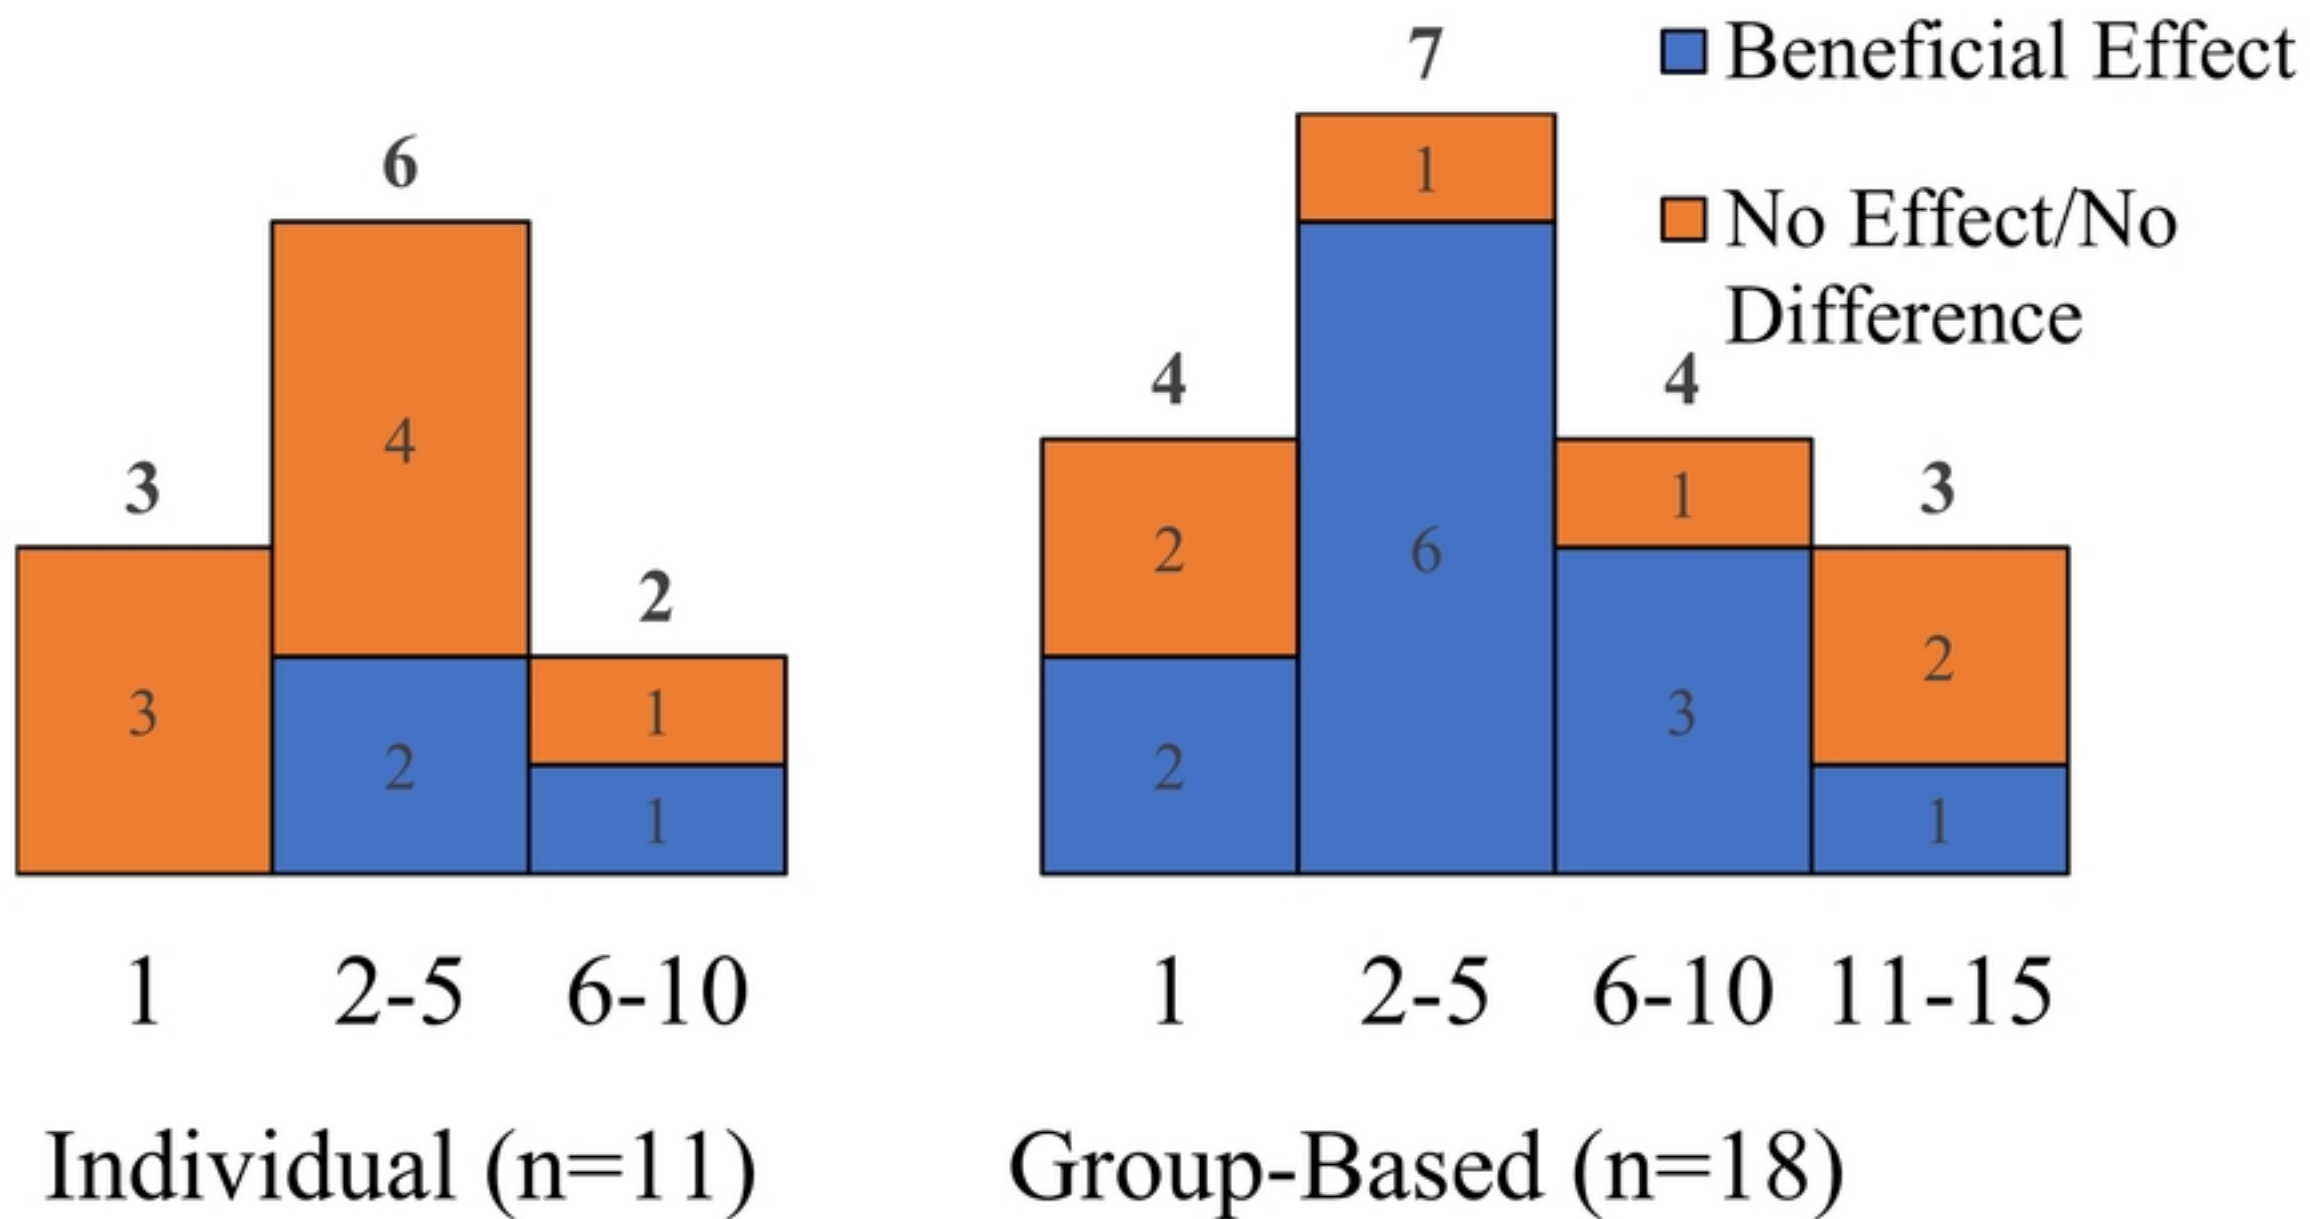

Fig4



# Length of Studies by Life Domain (Years)

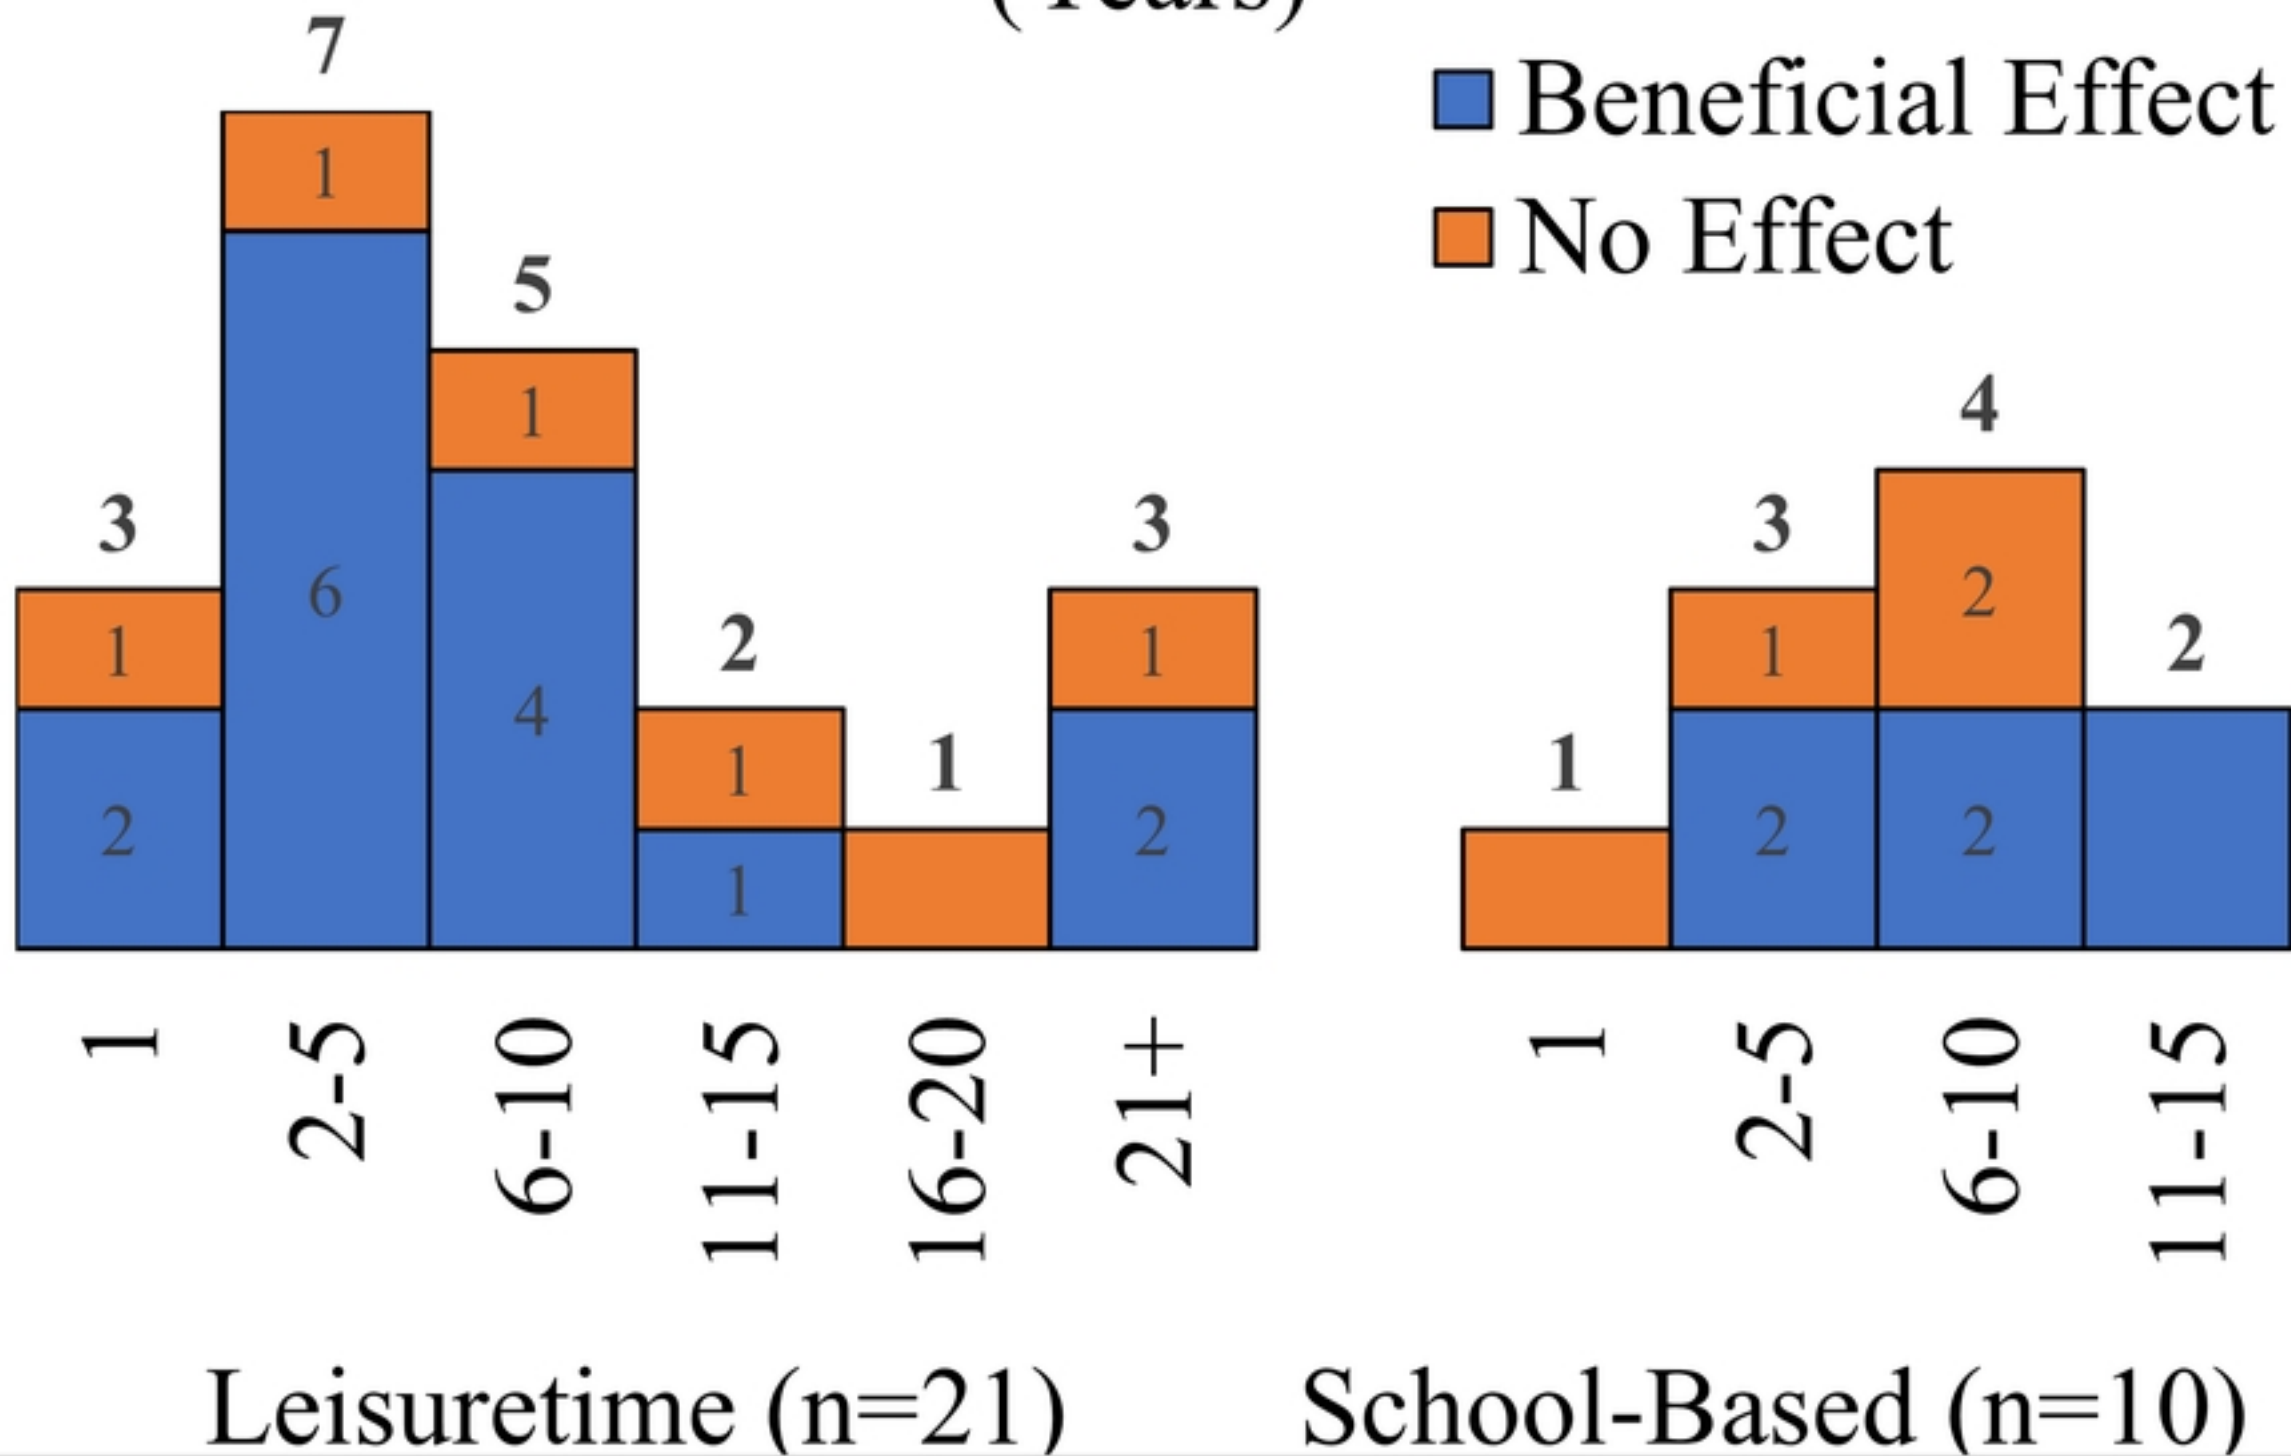

Fig5

# Length of Studies Investigating WHO MVPA Guidelines (Years)

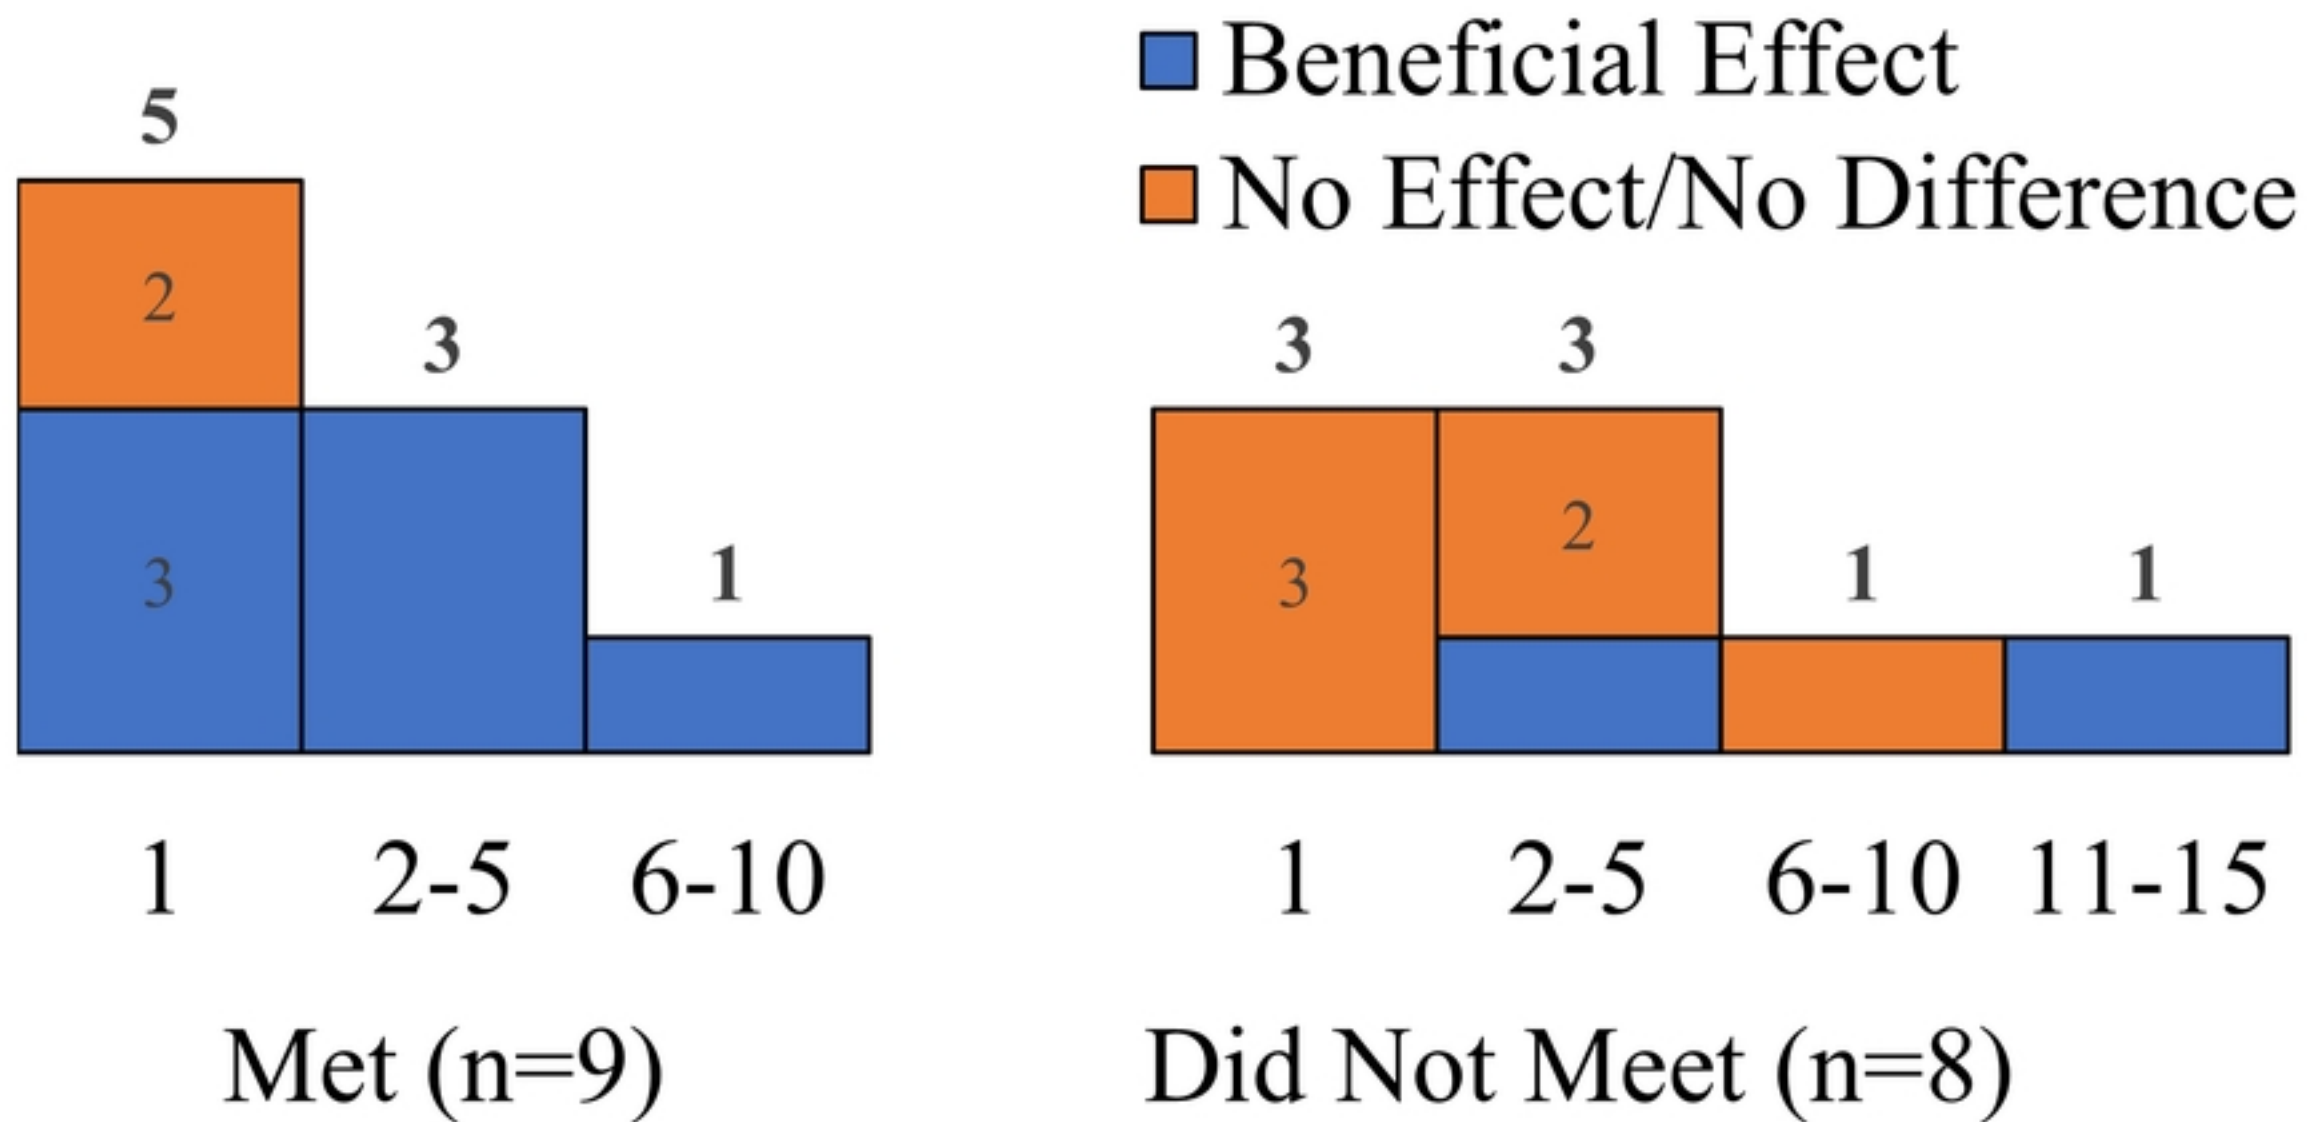

Fig6
